# 1 **Outwitting planarian's antibacterial defence mechanisms:**

## 2 ***Rickettsiales* bacterial trans-infection from *Paramecium***

### 3 ***multimicronucleatum* to planarians**

4  
5 Letizia Modeo<sup>1\*</sup>, Alessandra Salvetti<sup>2\*</sup>, Leonardo Rossi<sup>2</sup>, Michele Castelli<sup>3</sup>, Franziska Szokoli<sup>4</sup>,  
6 Sascha Krenek<sup>4,5</sup>, Elena Sabaneyeva<sup>6</sup>, Graziano Di Giuseppe<sup>1</sup>, Sergei I. Fokin<sup>1,7</sup>, Franco Verni<sup>1</sup>,  
7 Giulio Petroni<sup>1</sup>

8  
9 <sup>1</sup>Department of Biology, University of Pisa, Pisa, Italy

10 <sup>2</sup>Department of Clinical and Experimental Medicine, University of Pisa, Pisa, Italy

11 <sup>3</sup>Centro Romeo ed Enrica Invernizzi Ricerca Pediatrica, Department of Biosciences, University of  
12 Milan, Milan, Italy

13 <sup>4</sup>Institute of Hydrobiology, Dresden University of Technology, Dresden, Germany

14 <sup>5</sup>Department of River Ecology, Helmholtz Center for Environmental Research - UFZ, Magdeburg,  
15 Germany

16 <sup>6</sup>Department of Cytology and Histology, Faculty of Biology, Saint Petersburg State University,  
17 Saint Petersburg, Russia

18 <sup>7</sup>Department of Invertebrate Zoology, Saint Petersburg State University, Saint Petersburg, Russia

19  
20 \*Corresponding authors

21 [letizia.modeo@unipi.it](mailto:letizia.modeo@unipi.it) (LM); [alessandra.salvetti@unipi.it](mailto:alessandra.salvetti@unipi.it) (AS)

22  
23 RUNNING PAGE HEAD: *Rickettsiales* macronuclear endosymbiont of a ciliate can transiently  
24 enter planarian tissues

25

- 26 ORCID ID
- 27 Letizia Modeo: 0000-0003-2291-7218
- 28 Alessandra Salvetti: 0000-0002-9154-9773
- 29 Leonardo Rossi: 0000-0002-1143-8695
- 30 Michele Castelli: 0000-0003-2177-5772
- 31 Sascha Krenek: 0000-0002-5062-4140
- 32 Elena Sabaneyeva: 0000-0002-7939-8263
- 33 Graziano Di Giuseppe: 0000-0002-9999-7650
- 34 Sergei Fokin: 0000-0002-7329-5837
- 35 Franco Verni: 0000-0003-3537-5024
- 36 Giulio Petroni: 0000-0001-9572-9897

## 37 Abstract

38 Most of the microorganisms belonging to genera responsible for vector-borne diseases (VBD) have  
39 hematophagous arthropods as vector/reservoir. Recently, many new species of microorganisms  
40 phylogenetically related to agents of VBD were found in a variety of aquatic eukaryotic hosts, in  
41 particular, numerous new bacterial species related to the genus *Rickettsia* (*Alphaproteobacteria*,  
42 *Rickettsiales*) were discovered in protist ciliates and other unicellular eukaryotes. Although their  
43 pathogenicity for humans and terrestrial animals is not known, these bacteria might act as  
44 etiological agents of possible VBD of aquatic organisms, with protist as vectors. In the present  
45 study, we characterized a novel strain of the *Rickettsia*-Like Organism (RLO) endosymbiont  
46 “*Candidatus* (*Ca.*) *Trichorickettsia mobilis*” in the macronucleus of the ciliate *Paramecium*  
47 *multimicronucleatum* through Fluorescence *In Situ* Hybridization (FISH) and molecular analyses.  
48 Ultrastructural investigations on the presence of flagella confirmed previous studies on the same  
49 bacterial species. The potential trans-infection *per os* of this bacterium to planarians (*Dugesia*  
50 *japonica*), a widely used model system able to eliminate a wide range of bacteria pathogenic to  
51 humans and other Metazoa, was further verified. Ciliate mass cultures were set up, and trans-  
52 infection experiments were performed by adding homogenized paramecia to food of antibiotic-  
53 treated planarians, performed. Treated and non-treated (i.e. control) planarians were investigated at  
54 day 1, 3, and 7 after feeding for endosymbiont presence by means of PCR and ultrastructural  
55 analyses. Obtained results were fully concordant and suggest that this RLO endosymbiont can be  
56 transferred from ciliates to metazoans, being detected up to day 7 in treated planarian enterocytes  
57 inside and, possibly, outside phagosomes.

58

59 KEY WORDS Planarians, molecular and ultrastructural investigations, *Rickettsiaceae*, RLO  
60 endosymbiont, trans-infection experiments, vector-borne disease

61

## 62 Introduction

63 Bacteria of order *Rickettsiales* (*Alphaproteobacteria*) live in an obligate association with a wide range  
64 of eukaryotes [1-8], and, for their vast majority, are localized intracellularly, although the case of an  
65 extracellular *Rickettsiales* bacterium was recently documented [9]. *Rickettsiales* are widely studied  
66 for their involvement in medical and veterinary fields. Indeed, many of them (e.g. *Rickettsia* spp.,  
67 *Anaplasma* spp., *Ehrlichia* spp., and *Orientia tsutsugamushi*) are vectored by lice, ticks and mites,  
68 and cause mild to severe disease [1, 10], such as epidemic typhus, Rocky Mountain spotted fever [11-  
69 13], anaplasmosis, ehrlichiosis [14, 15], heartwater [16], and scrub typhus [17].

70 In the last two decades, many new genera and species of *Rickettsiales* were found as symbionts  
71 in a variety of other non-vector eukaryotic hosts, both from terrestrial and aquatic environments  
72 [reviewed in 3, 4, 7]. In particular, numerous such novel bacterial species were retrieved in aquatic  
73 protists [18-22], including, notably, parasitic (*Ichthyophthirius multifiliis*) [23, 24] and various free-  
74 living ciliates (e.g. *Paramecium* spp., *Euplotes* spp., *Diophrys oligothrix*, *Pseudomicrothorax dubius*,  
75 *Spirostomum minus*, and *Colpidium striatum*) [25-33].

76 Such findings have clearly indicated the ability of those “aquatic” *Rickettsiales* to perform  
77 horizontal transmission including host species shift, although mostly from indirect evidence, i.e.  
78 closely related bacteria in hosts as different as ciliates, hydra [34], corals [35], ring worms [36],  
79 ascidians [37, 38], as well as incongruent host and symbionts phylogenies [3, 39, 40]. In few cases,  
80 direct evidence in experimental interspecific transfers between unicellular hosts was produced [19,  
81 29].

82 In most cases the relationships between *Rickettsiales* associated with aquatic eukaryotes and  
83 their hosts were not clarified in detail, as in general no evident effect on host biology was observed  
84 [7], with the exception of “*Candidatus* (*Ca.*) *Xenohalictis californiensis*”, which is considered the  
85 cause of the withering syndrome in its abalone hosts [41, 42]. It has been hypothesized by different  
86 authors that bacteria, possibly including *Rickettsiales*, harboured by aquatic protists might constitute  
87 etiological agents of possible Vector Borne Diseases (VBD) of aquatic animals [55, 61]. Indeed,

88 protists could be the potential vectors for some of the numerous cases of epidemics caused by  
89 *Rickettsia*-Like Organisms (RLOs; i.e. intracellular bacteria morphologically similar to *Rickettsia*)  
90 determining an increasing number of massive deaths in intensive aquaculture facilities during the last  
91 years [62], including molluscs [41, 43, 44], crustaceans [45- 47) and fishes [48-50]. Although many  
92 RLOs were actually shown to be phylogenetically unrelated to *Rickettsiales* (e.g.  
93 *Gammaproteobacteria*) [51, 52, 46], at least in one case available data indicate a probable connection  
94 between a truly *Rickettsiales* bacterium and fish disease. In detail, a “*Ca. Midichloria mitochondrii*”-  
95 related bacterium was linked to the red-mark syndrome in rainbow trout [53-54]. Most importantly,  
96 although a transmission route was not directly proven, the same bacterium was found in association  
97 with the ciliate *I. multifiliis* [24], which is indeed a fish parasite. Interestingly, even other *Rickettsiales*  
98 symbionts (“*Ca. Megaira*” genus) can be found in the same ciliate host species, which might suggest  
99 a potential transmission route for these symbionts as well [23, 24].

100 Taking into account such premises, in order to investigate the hypothesis that protists can act  
101 as natural reservoir for potentially pathogenic bacteria [25, 55-61], we experimentally tested for the  
102 first time the possibility that endosymbionts of ciliates could be transferred to aquatic Metazoa. The  
103 *Rickettsiales* “*Ca. Trichorickettsia*” was chosen as candidate for trans-infection experiments as it  
104 shows a broad ciliate host range, infecting different cell compartment (i.e. cytoplasm and nucleus) of  
105 *Paramecium multimicronucleatum*, *Paramecium nephridiatum*, *Paramecium calkinsi* and *Euplotes*  
106 *aediculatus* [28, 63]. Additionally, in *P. multimicronucleatum* and *P. calkinsi*, “*Ca. Trichorickettsia*”  
107 appears covered by long flagella and is able to actively move [28, 63]. Thus, for our research purpose,  
108 we selected the newly isolated *P. multimicronucleatum* strain US\_BI 1611 as donor host in the trans-  
109 infection experiments. We characterized its macronuclear bacterial symbiont, assigning it to “*Ca.*  
110 *Trichorickettsia mobilis* subspecies *hyperinfectiva*” (*Rickettsiaceae*, *Rickettsiales*), previously  
111 discovered and described in the cytoplasm of *Paramecium calkinsi* [63]. As recipient, we selected the  
112 freshwater planarian *Dugesia japonica*. Freshwater planarians are benthic organisms, living in mud  
113 and under rocks in ponds and streams. They are zoophages or fleshing-eating animals, but ingest also

114 detritus, fungi, and bacteria [64]. Thus, they may encounter in their environment a large variety of  
115 microbes [65], including ciliates possibly hosting endosymbionts. Planarians have always been  
116 considered an important model for studying stem cells and regeneration [66], but recently they  
117 became also important for studying the natural immunity system of Metazoa [67-72]. Based on all  
118 these considerations, they appeared a suitable model for such experiments.

119 Bacterial endosymbiont trans-infection from *P. multimicronucleatum* to planarians was  
120 investigated by checking for the presence of “*Ca. Trichorickettsia mobilis*” in tissues of ciliate-treated  
121 planarians by means of PCR and Transmission Electron Microscopy (TEM). The findings obtained  
122 by means of the two investigation approaches allowed us to test the hypothesis that this endosymbiont  
123 can transfer from ciliate protists to Metazoa.

124

## 126 **Materials and methods**

### 127

### 128 **Ciliate host isolation, culturing, and identification**

129 *Paramecium multimicronucleatum* monoclonal strain US\_BI 16I1 was established from a cell  
130 isolated from a freshwater sample collected from the Yellowwood Lake (39°11'29,0''N,  
131 86°20'31,4''W), IN, USA and cultivated in San Benedetto mineral water (San Benedetto S. p. A.,  
132 Italy)

133 The strain was maintained in the laboratory in an incubator at a temperature of  $19 \pm 1$  °C and  
134 on a 12:12 light/dark cycle (irradiance by means of NATURAL L36W/76 and FLORA L36W/77  
135 neon tubes, OSRAM, Berlin, Germany). Instead of using bacteria as common food source for  
136 paramecia [73], cells were fed on monoclonal cultures of flagellated green algae, i.e. *Chlorogonium*  
137 sp. (freshwater) or, alternatively, *Dunaliella tertiolecta* (brackish water, 1 ‰ of salinity) to minimize  
138 bacterial load in cell cultures. They were fed two to three times per week to obtain a mass culture (1.5  
139 L) suitable for trans-infection experiments. Living ciliates were observed with a Leitz (Weitzlar,  
140 Germany) microscope equipped with differential interference contrast (DIC) at a magnification of  
141 100-1250x for general morphology and swimming behaviour according to [74, 75]. DIC observation  
142 of ciliates was also aimed at checking for macronuclear endosymbiont motility. Feulgen stained  
143 ciliates were observed to obtain information on the nuclear apparatus. Microscope images were  
144 captured with a digital camera (Canon PowerShot S45). Cell measurements were performed using  
145 ImageJ (<https://imagej.nih.gov/ij/>). Morphological identification was conducted according to  
146 literature data [76].

### 147

### 148 **Characterization of ciliate and endosymbiont**

149 Characterization of the ciliate host and its bacterial endosymbiont was performed through the “full  
150 cycle rRNA approach” [77], i.e. through the nuclear 18S rRNA gene (generally considered the  
151 preferred marker to study molecular taxonomy and phylogeny of eukaryotic organisms - just as an

152 example see [78]), ITS region and partial 28S gene (ciliate), and 16S rRNA gene (endosymbiont)  
153 sequencing, combined with Fluorescence *In Situ* Hybridization (FISH) experiments. Additionally,  
154 mitochondrial cytochrome c oxidase subunit I (COI) gene was sequenced as well, to display  
155 haplogroup variation in *P. multimicronucleatum* [79].

156 *Molecular characterization.* For molecular characterization of both ciliate host and bacterial  
157 endosymbiont, total DNA was extracted from approximately 50 *Paramecium* cells as described in  
158 [30, 31]. All PCR reactions were carried out with the Takara ExTaq (Takara, Kusatsu, Japan) reaction  
159 kit. COI gene was amplified using the degenerated forward primer F338dT and reverse primer  
160 R1184dT [80], while for 18S rRNA gene amplification the forward 18S F9 Euk [81] and the reverse  
161 18S R1513 Hypo primers [82] were used. The ITS region (including partial 18S rRNA gene, ITS1,  
162 5.8S rRNA gene, ITS2, and partial 28S rRNA gene) sequence was obtained by PCR with the forward  
163 18S F919 and the reverse 28S R671 primers (modified according to [83]). 16S rRNA gene of the  
164 bacterial symbiont was amplified with the *Alphaproteobacteria*-specific forward primer 16S Alpha  
165 F19b and the universal bacterial reverse primer 16S R1522a [84]. Purified PCR products by  
166 NucleoSpin gel and PCR cleanup kit, Macherey-Nagel GmbH Düren, Germany) were directly  
167 sequenced at GATC Biotech AG (Constance, Germany). Internal primers were used to sequence 16S  
168 rRNA gene [84], 18S rRNA gene [85] and ITS regions [83]. The latter two sequences were then  
169 joined together, exploiting the partial overlap on the 18S rRNA gene sequences. For the COI gene  
170 sequencing, amplification primers were employed from both directions.

171 *FISH experiments.* Preliminary FISH experiments were performed using the eubacterial universal  
172 probe EUB338 [86] labelled with fluorescein-isothiocyanate (FITC) and the specifically designed  
173 probe Rick\_697 (5'-TGTTCCCTCCTAATATCTAAGAA-3') labelled with Cy3 to verify the presence  
174 of endosymbiotic bacteria belonging to the family *Rickettsiaceae* [28]. Based on the obtained results,  
175 i.e. the presence of a single positive signal in the ciliate macronucleus and the newly characterized  
176 16S rRNA gene sequence corresponding to "*Ca. Trichorickettsia mobilis* subspecies *hyperinfectiva*",  
177 a second FISH experiment was carried out using a species-specific probe, i.e. the probe



178 Trichorick\_142 (5'-GTTTCCAAATGTTATTCCATAC-3') [28] in combination with the eubacterial  
179 universal probe EUB338 [86]. The experiments followed the protocol by [87] employing a  
180 hybridization buffer containing no formamide, according to the recommendations for the used probes.  
181 Slides were mounted with SlowFade Gold Antifade with DAPI (Invitrogen, Carlsbad, USA) and  
182 viewed with a Zeiss AxioPlan fluorescence microscope (Carl Zeiss, Oberkochen, Germany) equipped  
183 with an HBO 100W/2 mercuric vapor lamp. Digital images were captured by means of a dedicated  
184 software (ACT2U, version 1.0).

185

## 186 **Planarian culturing**

187 Planarians used in this work belonged to the species *Dugesia japonica*, asexual strain GI [88].  
188 Animals were kept in artificial water (CaCl<sub>2</sub> 2.5mM; MgSO<sub>4</sub> 0.4mM; NaHCO<sub>3</sub> 0.8mM; KCl 77μM;)   
189 at 18°C in dim light conditions and fed with chicken liver (purchased from local food stores) prepared  
190 according to [89], once a week. Non-regenerating specimens, within 5-8 mm of length, were used for  
191 all experimental procedures, after being starved for about two weeks.

192

## 193 **Transmission electron microscopy (TEM)**

194 TEM preparations were obtained both for *P. multimicronucleatum* cells and planarians to study the  
195 ultrastructure of the ciliate-associated endosymbiont “*Ca. Trichorickettsia mobilis* subspecies  
196 hyperinfectiva” and to verify the success of trans-infection experiments (i.e. to check the animals for  
197 the presence of trans-infected ciliate endosymbionts in their tissues) respectively.

198 TEM preparations of *P. multimicronucleatum* cells were obtained according to [90]. Briefly,  
199 cells were fixed in a 1:1 mixture of 2.5% (v/v) glutaraldehyde in 0.1 M cacodylate buffer (pH 7.4),  
200 and 2% (w/v) OsO<sub>4</sub> in distilled water, ethanol and acetone dehydrated, and embedded in Epon-  
201 Araldite mixture. Ultrathin sections were stained with 4% (w/v) uranyl acetate followed by 0.2%  
202 (w/v) lead citrate.

203 TEM preparations of planarian specimens were obtained as previously described [91, 92],  
204 with minor modifications. Therefore, planarians were fixed with 3 % glutaraldehyde in 0.1 M  
205 cacodylate buffer, and post-fixed with 2 % osmium tetroxide for 2 h. After ethanol dehydration,  
206 samples were embedded in Epon-Araldite mixture. Ultrathin sections were stained with uranyl acetate  
207 and lead citrate and observed with a Jeol 100 SX transmission electron microscope.

208 *Negative staining.* For negative staining, several *P. multimicronucleatum* cells of the strain  
209 US\_BI 16I1 were washed in distilled water and squashed by means of a syringe; a drop of the resulting  
210 suspension was placed on a grid. Bacteria were allowed to precipitate for 2–3 min, then a drop of 1%  
211 uranyl acetate in distilled water was added for no longer than 1 min. The liquid was then absorbed  
212 with filter paper, the grid was air-dried, and observed under TEM.

213

## 214 **Trans-infection experiments**

215 Two trans-infection experiments with the same protocol were sequentially carried out along a period  
216 of four months. Each experiment was conducted by treating a fixed number of planarians with ciliate-  
217 enriched food, i.e. liver paste mixed with *P. multimicronucleatum* homogenate; from now on these  
218 animals will be referred to as “treated planarians”. As for experimental control, planarians fed on  
219 plain liver paste were used; these animals will be referred to as “control planarians”. Each trans-  
220 infection experiment was performed according to the following protocol:

- 221 1. 96 planarians were selected by eye from culture (see above), washed in fresh culturing water and  
222 collected in a Petri dish with 50 µg/ml gentamicin sulfate (Sigma, Saint Luis, MO, USA) dissolved  
223 in their culturing water (see above). This preliminary antibiotic treatment was performed to  
224 minimize potential endogenous bacteria contaminants without endangering the animals [93].  
225 Planarians were left in antibiotic treatment for 24 h under regular culturing conditions concerning  
226 temperature and light (see above) and kept under visual control during that period to verify their  
227 viability during the antibiotic treatment and by the time of trans-infection. Then, planarians were  
228 washed 6 times in their fresh culturing water and split into two equal groups of 48 individuals each

229 and accommodated in two different Petri dishes for the trans-infection procedure by means of  
230 feeding.

231 2. 1.5 L of *P. multimicronucleatum* mass culture (cell concentration:  $\sim 4 \times 10^5$  cell/L) was filtered  
232 with a nylon filter (pore size: 100  $\mu\text{m}$ ). Cells were washed twice in sterile San Benedetto mineral  
233 water to minimize potential bacterial contaminants, concentrated and harvested by means of  
234 centrifugation (400 x g per 10 min), so to reduce the medium volume to 2 ml. Then, cells were  
235 mechanically homogenized for 20 min by repeated passages through a syringe (needle: 22GA,  
236 0.70 mm in diameter). Cell homogenate was centrifuged (10,000 x g per 10 min), and the resulting  
237 pellet was resuspended in 50  $\mu\text{l}$  of planarian food (homogenized liver paste) by direct  
238 resuspension.

239 3. A group of 48 planarians was fed on *P. multimicronucleatum*-enriched liver paste (treated  
240 planarians), while the other group was in parallel fed on plain liver paste (control planarians). For  
241 feeding, food was sown on the bottom of the Petri dish. Animals were allowed to reach it and  
242 comfortably feed for a period of 2h under regular culturing conditions (see above). Attention was  
243 paid to planarian feeding behaviour during this period. As no differences were noted concerning  
244 feeding behaviour between treated and control planarians, and feeding procedure was exerted by  
245 all planarians as expected according to regular planarian culturing, we proceeded with the next  
246 steps. Two washing steps were then carried out removing the medium and adding fresh planarian  
247 culturing water. Finally, the two groups of animals were left in their fresh culturing water and in  
248 regular cultivation conditions in the two Petri dishes until the collection of specimens for the next  
249 TEM and PCR analyses at the three timepoints (see below) of the experiments. Animals were kept  
250 under visual control throughout the experiment to regularly check their viability.

251 4. At day 1, 3, and 7 after feeding (experimental timepoints), from each of the two Petri dishes  
252 containing treated and control planarians a group consisting of 16 animals were sampled: 4 animals  
253 were fixed and processed for TEM, and 12 were rapidly frozen and stored at  $-80^\circ\text{C}$  and dedicated  
254 to DNA extraction (4 animals per each sample).

## 255 **PCR verification of trans-infection success**

256 Treated and control planarians were processed for genomic DNA extraction, purification, and PCR  
257 amplification with endosymbiont-specific primers. For each experimental condition (treated and  
258 control planarians) and each experimental timepoint (1, 3, and 7 days after feeding), genomic DNA  
259 was extracted from frozen samples by using the Wizard Genomics DNA purification kit (Promega,  
260 Madison, WI, USA). One microliter of purified DNA was analysed by gel electrophoresis to check  
261 for integrity. DNA was quantified using a Nanodrop spectrophotometer. For each experimental  
262 timepoint of both experimental conditions (i.e. treated and control planarians), similar amounts of  
263 genomic DNA were used for amplification using the ampli-Taq-gold DNA polymerase (Applied  
264 Biosystems, Foster City, CA, USA) and for a nested PCR assay. The first primer pair used, specific  
265 for “*Ca. Trichorickettsia mobilis*”, was RickFla\_ F69 5’-GTAACTTAGGGCTTGCTC-3’ and  
266 Rick\_R1455 5’-CCGTGGTTGGCTGCCT-3’ [28]; PCR conditions were: 3 minutes at 94°C; 5 cycles  
267 each consisting of 30 s at 94°C, 30 s at 58°C, 2 minutes at 72°C; 10 cycles each consisting of 30 s at  
268 94°C, 30 s at 54°C, 2 minutes at 72°C; 25 cycles each consisting of 30 s at 94°C, 30 s at 50°C, 2  
269 minutes at 72°C; ending with 7 minutes at 72°C. The second, nested primer pair used was  
270 RickFla\_F87 5’-CTCTAGGTAAATCAGTAGCAA-3’ and Rick\_R1270 5’-  
271 TTTTAGGGATTGCTCCACG-3’ [28]. For nested PCR assay, one microliter of PCR product of  
272 the first PCR assay was used as a template; PCR conditions were as above.

273 For each experimental condition and each timepoint of the two trans-infection experiments,  
274 the DNA amplification was performed in duplicate. Samples were considered positive if a single band  
275 of the expected size was recorded after nested amplification. Sequencing of amplicons was carried  
276 out to confirm the presence of “*Ca. Trichorickettsia mobilis*” using the primer RickFla\_F87 (see  
277 above) and Sanger sequencing (BMR Genomics, Padova, Italy).

278 Samples obtained from control planarians were used as PCR negative control. As positive  
279 control, genomic DNA purified from *P. multimicronucleatum* monoclonal strain US\_B1 16I1 was  
280 processed.

## 281 **Results**

### 282 **Host morphological and molecular identification**

283 Ciliate strain US\_BI 16I1 (Figs 1a, 1b; Supplementary Material; S1 and S2 Figs) was confirmed in  
284 morphological inspections as *Paramecium multimicronucleatum* Powers and Mitchell, 1910 [94]  
285 considering features of key-characters such as cell size, number and features of micronuclei (mi), and  
286 number and features of contractile vacuoles (CV) (S1 and S2 Figs), as described in previous literature  
287 [76, 95-98]. The molecular analysis of the combined (partial) 18S rRNA-ITS1-5S rRNA gene-ITS2-  
288 (partial) 28S rRNA gene sequence (2792 bp, GenBank accession number: MK595741) confirmed the  
289 species assignment by morphological identification with a 100% sequence identity with the sequences  
290 of other *P. multimicronucleatum* strains already present in GenBank presenting either 18S rRNA gene  
291 portion only (AB252006 and AF255361), or the ITS portion (AY833383, KF287719, JF741240 and  
292 JF741241). COI gene sequence identity of strain US\_BI 16I1 (760 bp, accession number: MK806287)  
293 is highest with another *P. multimicronucleatum* haplotype (FJ905144.1; 96.3%).

### 295 **Endosymbiont identification and features**

296 As in *Paramecium* three different subspecies of RLOs “*Ca. Trichorickettsia mobilis*” have been  
297 described [63], 16S rRNA gene amplification was performed to identify endosymbionts associated  
298 with *P. multimicronucleatum* US\_BI 16I1 strain (sequence length 1,563 bp, accession number:  
299 MK598854), which allowed to assign it to “*Ca. Trichorickettsia mobilis* subsp. hyperinfectiva”, an  
300 endosymbiont described in the cytoplasm of *Paramecium calkinsi* (99.8 % identity of the novel  
301 sequence with type strain MF039744.1) [63]. FISH experiments (Figs 1c-1e) performed by using  
302 eubacterial universal probe EUB338 (Fig 1c) and the species-specific probe Trichorick\_142 (Fig 1d)  
303 confirmed this result but disclosed a different, novel bacterial localization, i.e. the ciliate  
304 macronucleus (roughly with a presence of about 100 endosymbionts). Additionally, the full  
305 overlapping of eubacterial universal probe EUB338 and “*Ca. Trichorickettsia*”-specific probe signals

306 indicated that this symbiont constituted the total set of intracellular bacteria in host *P.*  
307 *multimicronucleatum* US\_BI 16I1 cells (Fig 1e, merge).

308 In TEM-processed ciliate cells, the endosymbionts were confirmed to be hosted in the  
309 macronucleus; they showed a two-membrane cell wall typical for Gram-negative bacteria and  
310 appeared rod-shaped, with rounded to narrower ends (Fig 2). They were surrounded by a clear halo  
311 and not encircled by any symbiosomal vacuole, i.e. they appeared in direct contact with host nuclear  
312 material. Their size was  $\sim 1.2\text{--}2.1 \times 0.5\text{--}0.6 \mu\text{m}$ , and they were scattered throughout the  
313 macronucleus of the ciliate (Figs 2a-2d). Sometimes in their cytoplasm several electron-lucid “holes”  
314 (diameter:  $\sim 0.2 \mu\text{m}$ ), were observed (Fig 2a), as already described in the same endosymbiont in *P.*  
315 *calkinsi* [63]. Bacterial cytoplasm was electron-dense and rich in ribosomes (Fig 2b); the presence of  
316 additional cytoplasmic components (e.g. electron-dense particles with a special arrangement) was not  
317 disclosed. Endosymbionts displayed thin (diameter:  $\sim 0.009 \mu\text{m}$ ) and short flagella distributed all  
318 around the cell (Figs 2a and 2c-2d) which sometimes formed a putative tail emerging from a cell end  
319 (Fig 2d). The presence of longer flagella was evident after negative staining procedure (Fig 3): besides  
320 some short flagella occurring all around the cell, at least a few longer and thicker flagella ( $\sim 2 \times 0.012$   
321  $\mu\text{m}$ ) arose from one of cell ends.

322 Some active bacterial motility, likely obtained by means of their flagella, was recorded inside  
323 the macronucleus of intact *P. multimicronucleatum* cells during observation under DIC microscope  
324 at 1,000x. Endosymbionts were seen to move through the chromatin bodies covering short distances  
325 (Supplementary Movie SM1). After ciliate cell squashing the released bacteria were still capable of  
326 movement (data not shown).

327

328 **Fig 1. Results of FISH experiments on a *P. multimicronucleatum* US\_BI 16I1 cell.** (a) bright field  
329 microscopy (Ma, macronucleus). (b) after DAPI staining. (c) treated with the almost universal  
330 bacterial probe EUB338 double labelled with fluorescein (green) (probe labelling both at 5' and 3'  
331 ends). (d) treated with species-specific probe Trichorick\_142 labelled with Cy3 (red) targeting “*Ca.*

332 *Trichorickettsia mobilis*". (e) merge of c and d. The number of endosymbionts targeted by the species-  
333 specific probe in the macronucleus reached ~ 100 (d, e). Scale bars stand for 10  $\mu\text{m}$ .

334

335 **Fig 2. TEM pictures showing the morphological-ultrastructural details of “*Ca. Trichorickettsia***  
336 ***mobilis* subsp. *hyperinfectiva*” in the macronucleus of *P. multimicronucleatum* US\_BI 16I1. (a)**  
337 longitudinally and transversely-sectioned endosymbionts inside macronucleus (Ma) with a double  
338 membrane and surrounded by a clear halo; electron-lucid roundish areas occur in the cytoplasm of  
339 some endosymbionts; (b) numerous bacterial ribosomes are visible; (c, d) bacterial flagella are short,  
340 located either around (arrow) the endosymbiont cell or at a cell pole, where they can form a putative  
341 tail (arrowhead). Scale bars stand for 0.5  $\mu\text{m}$ .

342

343 **Fig 3. Negative contrast at TEM of a specimen of “*Ca. Trichorickettsia mobilis* subsp.**  
344 ***hyperinfectiva*”.** Some short flagella are present and at least two longer flagella (arrow) arise from  
345 one of cell ends. Scale bar stands for 1  $\mu\text{m}$ .

346

## 347 **Trans-infection experiments**

348 The success of each of the two independent trans-infection experiments performed was investigated  
349 by means of DNA extraction/PCR experiments and TEM observation on treated (i.e. fed on ciliate  
350 homogenate added to liver paste) and control (i.e. untreated, fed on plain liver paste) planarians at the  
351 different experimental timepoints, according to the described experimental procedure. By verifying  
352 the possible presence of *P. multimicronucleatum* endosymbiont “*Ca. Trichorickettsia mobilis*” in  
353 extracted as well as TEM processed animals, the two investigation methods produced completely  
354 overlapping results on planarians used in the two trans-infection experiments and with full  
355 concordance on trans-infection success. Thus, for each of the two different investigation methods,  
356 results of the two trans-infection experiments are concurrently reported in the following sections.  
357 Similarly, figures showing the results of the trans-infection experiment at the different experimental

358 timepoints (Figs 4 and 5, S3 Fig) are meant to be representative for both performed experiments,  
359 irrespective of the specific experiment they refer to.

360 *PCR experiments.* The DNA of “*Ca. Trichorickettsia mobilis*” was detected at all  
361 experimental timepoints (1, 3, and 7 days after feeding) in genomic DNA preparations obtained from  
362 all investigated planarians fed on *P. multimicronucleatum* lysate-enriched liver paste. The size of the  
363 nested amplicon (1360 bp) obtained from treated planarian samples matched the size of the amplicon  
364 obtained in DNA purified from ciliate monoclonal strain US\_BI 16I1 (positive control). The  
365 sequencing of the obtained amplicons confirmed the specificity for “*Ca. Trichorickettsia mobilis*”  
366 (100% sequence identity with MF039744.1).

367 No amplification product was obtained in genomic DNA samples from control planarians fed  
368 on plain liver paste (negative control).

369 *TEM observation.* Ultrastructural observation was conducted on TEM-processed specimens  
370 per each timepoints of the experiments, for both experimental groups, i.e. treated and control  
371 planarians.

372 In tissues collected from the investigated planarians fed on *Paramecium* US\_BI 16I1 lysate-  
373 enriched liver paste, the presence of bacteria with morphology and sizes (see below for details) fitting  
374 with those of ciliate endosymbionts within intestinal cells was detected at all timepoints of the two  
375 experiments (Figs 4 and 5).

376 One day after feeding, several bacteria were recognizable in planarian enterocyte phagosomes.  
377 Some of them were still intact (Figs 4a and 4b), even performing cell division. Others appeared  
378 degraded, being subjected to digestion (data not shown). In several cases, membrane of bacteria-  
379 including phagosomes was damaged and interrupted (Figs 4a and 4b). Bacteria free in the cytoplasm  
380 of planarian intestinal cells, i.e. in direct contact with their cytoplasm, were detected as well; they  
381 showed a two-membrane cell wall and a surrounding clear halo (Figs 4c-4f), with electron-lucid  
382 “holes” sometimes visible inside their cytoplasm (Fig 4e). Flagella (diameter: ~ 0.009  $\mu\text{m}$ ) could also  
383 be detected all around bacteria (Figs 4b-4d and 4f). Additionally, extruded trichocysts (extrusive



384 organelles typical of *Paramecium*), presumably included in *Paramecium* homogenate and ingested  
385 by treated planarians, were easily recognizable inside intestinal cell phagosomes (Fig 4g).

386 A similar scenario was observed 7 days after feeding, when most of the bacteria occurred  
387 enclosed inside planarian enterocyte phagosomes (Figs 5a and 5b); some appeared degraded (not  
388 shown), while many others did not show degraded conditions and could survive in the phagosomes  
389 (Figs 5a and 5b). In few cases, bacterial-like circular-ovoid shapes were also observed in the  
390 cytoplasm of intestinal cells, outside from phagosomes (Fig 5c).

391 No bacteria were ever observed in tissues other than intestine in treated planarians; similarly,  
392 no bacteria were observed in tissues of investigated TEM-processed control animals (S3 Fig).

393

394 **Fig 4. TEM pictures of the intestine of *D. japonica* treated with liver paste enriched with the**  
395 **homogenate of *P. multimicronucleatum* US\_BI 16I1 cells and fixed at day 1 after feeding. (a, b)**  
396 **(b, enlargement of a particular of a) a flagellated bacterium (B) inside a phagosome whose membrane**  
397 **is interrupted (arrowhead); L, lumen of planarian intestine; (c, d) (d, enlargement of a particular of c)**  
398 **a longitudinally sectioned bacterium (B) free in the cytoplasm of an intestinal cell of a treated**  
399 **planaria; (e) another free bacterium, showing cytoplasmic electron-lucid “holes”; (f) a recovered**  
400 **flagellated bacterium in cross section. (g) an intact extruded trichocyst (T) (extrusive organelle) of**  
401 ***Paramecium* detected in planarian intestine. Arrows, flagella. Scale bars stand for 1  $\mu\text{m}$  (a-e, g), and**  
402 **0.5  $\mu\text{m}$  (f).**

403

404 **Fig 5. TEM pictures of the intestine of *D. japonica* fixed at day 7 after feeding with liver paste**  
405 **enriched with the homogenate of *P. multimicronucleatum* US\_BI 16I1 cells. (a, b) bacteria**  
406 **recognizable inside phagosomes and (c) bacterial shapes in the cytoplasm of an intestinal cell. L, lipid**  
407 **droplet; arrow, bacteria; arrowhead, mitochondria; double arrowhead, flagella. Scale bars stand for 1**  
408  **$\mu\text{m}$ .**

409

## 410 **Discussion**

### 411 **Trans-infection experiments**

412 The alphaproteobacterium “*Ca. Trichorickettsia mobilis* subsp. hyperinfectiva”, previously  
413 described in the cytoplasm of *P. calkinsi* [63], was retrieved in this study also in the macronucleus of  
414 the ciliate *P. multimicronucleatum* strain US\_BI 16I1 s. “*Ca. Trichorickettsia mobilis*” up to now has  
415 been exclusively retrieved as an endosymbiont of ciliates belonging to the genera *Paramecium* and  
416 *Euplotes* [28, 63]. At present, three subspecies of this RLO endosymbiont have been identified on  
417 molecular basis [63]; a comparison among them in the light of the present findings, which suggest a  
418 certain morphological plasticity of this bacterium, is presented in Supplementary Material.

419 The aim of the present paper was to verify the potential trans-infection of the *Rickettsia*-related  
420 macronuclear endosymbiont “*Ca. Trichorickettsia mobilis* subsp. hyperinfectiva” of the ciliate *P.*  
421 *multimicronucleatum* strain US\_BI 16I1 to the metazoan model planarian *D. japonica*. There are  
422 several studies reporting on the host/symbiont relationships of different *Paramecium* species with  
423 different *Rickettsiales*; *P. multimicronucleatum* lies in this ciliate selection, and is a rather a common  
424 species, sharing the freshwater habitat with planarians. Thus, it was chosen as donor in trans-infection  
425 experimental context as, in our opinion, it can be considered a suitable candidate as putative  
426 environmental vector for RLOs. Additionally, the biology of this ciliate host is well-known, and the  
427 strain US\_BI 16I1 could be comfortably cultivable under laboratory conditions using flagellates  
428 instead of bacteria as food source.

429 According to the present findings, the trans-infection experiments were successful, i.e. they  
430 showed the capability of “*Ca. Trichorickettsia mobilis*” to enter the tissues of planarians. Indeed, in  
431 the intestine of planarians, previously antibiotic-treated to avoid bacterial contamination and fed on  
432 liver paste enriched with pellet of ciliate homogenate (including “*Ca. Trichorickettsia*” symbionts),  
433 we could observe up to day 7 after feeding the presence of flagellated bacteria with a morphology  
434 and a size fully resembling those of the RLO endosymbiont of *P. multimicronucleatum* US\_BI 16I1.

435 In our TEM experiments, besides undigested bacteria enclosed in phagosomes, in few cases circular-  
436 ovoid shapes, resembling “*Ca. Trichorickettsia*” bacteria, were observed in the cytoplasm of planarian  
437 intestine cells, free from phagosomal membrane (Figs 4 and 5).

438 On the contrary with respect to treated animals, in TEM preparations of controls (i.e.  
439 antibiotic-treated planarians fed on plain liver paste) no bacteria were found (S3 Fig).

440 These results were confirmed and supported by PCR analysis and sequencing of obtained  
441 amplicons: the DNA of “*Ca. Trichorickettsia mobilis*” was recovered in treated planarians up to day  
442 7 after feeding while in control animals no RLO DNA was amplified and detected. On the other side,  
443 no morphological or behavioural alterations were observed in the planarians

444 Our findings are in line with those by [99]. These authors studied the phylogenetic identities  
445 of digestion-resistant bacteria that could survive starvation and form relatively stable associations  
446 with some marine and freshwater ciliate species, and demonstrated that the classes  
447 *Alphaproteobacteria* (which includes the order *Rickettsiales*) and *Gammaproteobacteria* are  
448 prevalent as digestion-resistant bacteria; from this study a putative significant role of secretion  
449 systems in promoting marine protist-bacteria associations resulted as well.

450 In our experiments, after being ingested by planarians, the bacteria were observed enclosed  
451 inside phagosomes of intestinal cells. This also occurred in previous experiments investigating the  
452 resistance of planarians to infection by bacterial strains pathogenic for humans and other metazoans  
453 [67]. In that research, planarians could eliminate most of the phagocytised bacterial strains within 3-  
454 6 days post-feeding thanks to 18 resistance genes, such as *MORN2*, so that the authors suggested that  
455 planarians can be considered a model to identify innate resistance mechanisms. Thus, the evidence  
456 we obtained that the “*Ca. Trichorickettsia*” endosymbionts of *P. multimicronucleatum* US\_BI 1611  
457 are still detectable in planarian intestine enterocytes inside and outside phagosomes up to 7 days after  
458 feeding could possibly indicate the capability of “*Ca. Trichorickettsia mobilis* subsp. *hyperinfectiva*”  
459 to avoid typical defence mechanisms exploited by planarians.

460 TEM observations indicated that in some cases *P. multimicronucleatum* RLO could possibly

461 occur outside digestive vacuoles, whose membrane often appeared fractured. Thus, we can  
462 hypothesize that this bacterium can transitionally enter and perhaps survive within planarian tissues,  
463 although present results do not allow yet to drive unambiguous conclusions on this regard.  
464 Interestingly, similarly to some *Gammaproteobacteria* such as *Rheinheimera* sp. strain EpRS3  
465 (*Chromatiaceae*), capable of escaping from phagosomes of the ciliate *Euplotes aediculatus* when fed  
466 on the bacterium plus its culture medium [100], *Rickettsiaceae* are already known for their ability to  
467 escape the host vacuolar membrane, residing freely in the host cytoplasm, where they may exploit  
468 host cytoskeleton for movement [101-103, 12, 17].

469 Another interesting parallelism might be made with the so-called “eta” particles (i.e.  
470 intracellular bacteria) hosted in the cytoplasm of the ciliate *Euplotes crassus* killer cell strain M on  
471 *E. crassus* sensitive cell strain 21A7 fed on strain M homogenate [104]. In that study, “eta” particles  
472 conferred ciliate strain 21A7 a transitory resistance to killing effect during their permanence as free  
473 entities in its cytoplasm: indeed, after being collected into the digestive vacuoles, “eta” particles were  
474 pushed towards the periphery of the vacuole and those still not digested were capable of escaping into  
475 ciliate cytoplasm through vacuole membrane rupture.

476 Unfortunately, just as in the studies by Chiellini et al. [100] and Verni et al. [104], we are  
477 currently not able to provide here clues on the potential bacterial mechanisms involved in planarian  
478 phagosome escaping.

479 To the best of our knowledge, this is the first time that a set of experimental bioassays was  
480 performed to verify the transmission of a “true” and ascertained *Rickettsiales* bacterium from an  
481 infected protist to an uninfected metazoan of the same aquatic environment (freshwater). On the other  
482 side, in the past, efforts have been put to experimentally verify the transmission of morphologically  
483 RLOs among aquatic organisms. For example, Nunan et al. [105] performed bioassays to verify the  
484 transmission of the infection between two species of commercially farmed shrimps, i.e. the infected  
485 *Penaeus monodon* and the specific pathogen-free *Penaeus vannamei*, with the aim of investigating  
486 the suspected causative agent of severe mortality in farms where those organisms are in co-culture

487 (grow-out ponds). The bioassays were performed both via injection of infected shrimp homogenate  
488 into uninfected shrimps and per *os* exposure of uninfected shrimps to tissue taken from infected  
489 shrimps. Only injection bioassays were successful leading to an infection, while per *os* infection  
490 failed. Among different possible reasons for this negative result those authors cited the potential need  
491 for a vector to disseminate the disease. According to our findings, ciliates could represent suitable  
492 vectors in this kind of situation. In our experiments, as distinct from Nunan et al. [105], we chose  
493 only to perform the bioassay per *os* exposure of animals instead of injection into the planarian  
494 intestine. Endosymbionts, separated from ciliate cells through cell rupture and centrifugation, could  
495 be easily mixed with planarian food and seeded on the bottom of a Petri dishes so as to allow animals  
496 to reach it and feed. As we dealt with endosymbionts, which are present in limited numbers inside  
497 their ciliate host, we chose to treat the planarians with cell mass culture homogenate instead of adding  
498 living ciliates to planarians food. This allowed processing of as many ciliates as possible to maximize  
499 the probability of endosymbiont ingestion by the animals, thereby increasing the chance of detection  
500 of successful trans-infection via PCR and TEM-based approaches.

501 We believe that our findings may offer intriguing insights when considered from several  
502 points of view, such as concerning the pathologies caused by *Rickettsiales* or RLOs occurring in fish  
503 farms or in the wild, which might have ciliates or other protists as putative vectors. Although there is  
504 still a need for further investigations on this topic to expand its implications, we think that our study  
505 can serve as basis for conceiving long-lasting experiments aiming to better understand whether “*Ca.*  
506 *Trichorickettsia mobilis*”, as well as other *Rickettsiales* symbionts of protists, can be able to survive  
507 longer and potentially replicate in tissues of planarians and other aquatic Metazoa, and whether these  
508 RLOs may have some impact on the recipient host health.

509

## 510 **Compliance with Ethical Standards**

511 *Ethics Approval.* This study does not contain any studies with human participants performed by any  
512 of the authors. All procedures performed in studies involving animals were in accordance with the

513 ethical standards of the institution or practice at which the studies were conducted.

514 *Conflict of Interest.* The authors declare that they have no conflict of interest.

515

## 516 **Acknowledgments**

517 The authors wish to thank Francesco Paolo Frontini, Fabrizio Erra, and Federica Vantaggio for ciliate  
518 culturing and *in vivo* processing; Claudio Ghezzi and Simone Gabrielli for assistance with TEM  
519 material; Simone Gabrielli for help with graphic artwork, Thomas Berendonk for the opportunity to  
520 collaborate on *Paramecium*. Financial support: project PRA\_2016\_58, University of Pisa to GP;  
521 RFBR grant N° 18-04-00562-a to ES. All authors critically read and approved the manuscript.

522

## 523 **Author Contributions**

524 Conceptualization: GP, FV, AS, LM, LR.

525 Formal analysis: LM, AS, LR, FS, MC.

526 Funding acquisition: GP, ES.

527 Investigation: LM, AS, LR, FS.

528 Project administration: GP.

529 Supervision: GP, FV.

530 Visualization: LM, AS.

531 Writing – original draft: LM, AS, LR, MC.

532 Writing – review & editing: FV, GP, FS, ES, GDG, SIF, SK.

533

## 534 **References**

535 1. Dumler JS, Barbet AF, Bekker CP, Dasch GA, Palmer GH, Ray SC, et al. Reorganization of genera  
536 in the families *Rickettsiaceae* and *Anaplasmataceae* in the order *Rickettsiales*: unification of some  
537 species of *Ehrlichia* with *Anaplasma*, *Cowdria* with *Ehrlichia* and *Ehrlichia* with *Neorickettsia*,

- 538 descriptions of six new species combinations and designation of *Ehrlichia equi* and 'HGE agent' as  
539 subjective synonyms of *Ehrlichia phagocytophila*. Int J Syst Evol Microbiol. 2001; 51: 2145-2165.  
540 doi: 10.1099/00207713-51-6-2145.
- 541 2. Taylor MJ, Bandi C, Hoerauf A. *Wolbachia* endosymbionts of filarial nematodes. Adv. Parasitol.  
542 2005; 60: 245-284. doi: 10.1016/S0065-308X(05)60004-8.
- 543 3. Perlman SJ, Hunter MS, Zchori-Fein E. The emerging diversity of *Rickettsia*. Proc R Soc B. 2006;  
544 273: 2097-2106. doi: 10.1098/rspb.2006.3541.
- 545 4. Weinert LA, Werren JH, Aebi A, Stone GN, Jiggins FM. Evolution and diversity of *Rickettsia*  
546 bacteria. BMC Biol. 2009; 7:6. doi: 10.1186/1741-7007-7-6.
- 547 5. Gillespie JJ, Nordberg EK, Azad AF, Sobral BWS. Phylogeny and comparative genomics: The  
548 shifting landscape in the genomics era. In: Palmer GH, Azad AF, editors. Intracellular pathogens II  
549 *Rickettiales*. Washington: ASM Press; 2012. pp. 84-141.
- 550 6. Dumler JS, Walker DH. *Rickettsiales*. In: Whitman WB, Rainey F, Kämpfer P, Trujillo M, Chun  
551 J, De Vos P, Hedlund B, Dedysched S, editors. Bergey's Manual of systematics of Archaea and  
552 Bacteria. John Wiley & Sons, Ltd. 2015. Available from:  
553 <https://doi.org/10.1002/9781118960608.obm00074>.
- 554 7. Castelli M, Sasser D, Petroni G. Biodiversity of “non-model” *Rickettsiales* and their association  
555 with aquatic organisms. In: Thomas, S editor. *Rickettsiales* - Biology, Molecular Biology,  
556 Epidemiology, and Vaccine Development. Cham, Switzerland: Springer International Publishing;  
557 2016. pp. 59-91.
- 558 8. Chan LL, Mak JW, Ambu S, Chong PY. Identification and ultrastructural characterization of  
559 *Acanthamoeba* bacterial endocytobionts belonging to the *Alphaproteobacteria* class. PLoS ONE.  
560 2018. 13: e0204732. Available from: <https://doi.org/10.1371/journal.pone.0204732>.
- 561 9. Castelli M, Sabaneyeva E, Lanzoni O, Lebedeva N, Floriano A M, Gaiarsa S, et al. *Deianiraea*,  
562 an extracellular bacterium associated with the ciliate *Paramecium*, suggests an alternative scenario

- 563 for the evolution of *Rickettsiales*. 2019a. ISME J. Available from: <https://doi.org/10.1038/s41396->  
564 [019-0433-9](https://doi.org/10.1038/s41396-019-0433-9).
- 565 10. Dumler JS, Walker DH. *Rickettsiales*. In: Whitman WB, Rainey F, Kämpfer P, Trujillo M, Chun  
566 J, De Vos P, Hedlund B, Dedysched S, editors. Bergey's Manual of systematics of Archaea and  
567 Bacteria. John Wiley & Sons, Ltd. 2015. Available from:  
568 <https://doi.org/10.1002/9781118960608.obm00074>.
- 569 11. Raoult V, Roux V. Rickettsioses as paradigms of new or emerging infectious diseases. Clin  
570 Microbiol Rev. 1997; 10: 694-719.
- 571 12. Walker DH, Ismail N. Emerging and re-emerging rickettsioses: endothelial cell infection and  
572 early disease events. Nat Rev Microbiol. 2008; 6: 375-386. doi: 10.1038/nrmicro1866.
- 573 13. McQuiston JH, Paddock CD. Public health: Rickettsial infections and epidemiology. In:  
574 Intracellular Pathogens II: *Rickettsiales*. American Society of Microbiology. 2012; pp 40-83.
- 575 14. Dumler JS, Madigan JE, Pusterla N, Bakken JS. Ehrlichioses in humans: epidemiology, clinical  
576 presentation, diagnosis, and treatment. Clin Infect Dis. 2007; 45: S45-S51. doi: 10.1086/518146.
- 577 15. Rikihisa Y. *Anaplasma phagocytophilum* and *Ehrlichia chaffeensis*: subversive manipulators of  
578 host cells. Nat Rev Microbiol. 2010; 8: 328-339. doi: [10.1038/nrmicro2318](https://doi.org/10.1038/nrmicro2318).
- 579 16. Allsopp BA. Heartwater – *Ehrlichia ruminantium* infection: Rev Sci Tech Off Int Epiz. 2015;  
580 34: 557-568.
- 581 17. Ge Y and Rikihisa Y. Subversion of host cell signaling by *Orientia tsutsugamushi*. Microbes and  
582 Infect. 2011; 13: 638-648. doi: 10.1016/j.micinf.2011.03.003.
- 583 18. Kawafune K, Hongoh Y, Hamaji T, Sakamoto T, Kurata T, Hirooka et al. Two different rickettsial  
584 bacteria invading *Volvox carteri*. PloS ONE. 2015; 10: e0116192. Available from:  
585 <https://doi.org/10.1371/journal.pone.0116192>.
- 586 19. Schulz F, Martijn J, Wascher F, Lagkouvardos I, Kostanjšek R, Ettema TJG, et al. A *Rickettsiales*  
587 symbiont of amoebae with ancient features. Environ Microbiol. 2016; 18: 2326-2342. doi:  
588 [10.1111/1462-2920.12881](https://doi.org/10.1111/1462-2920.12881).



- 589 20. Yang A, Narechania A, Kim E. Rickettsial endosymbiont in the “early-diverging” streptophyte  
590 green alga *Mesostigma viride*. J Phycol. 2016; 52: 219-229. doi: 10.1111/jpy.12385.
- 591 21. Hess S. Description of *Hyalodiscus flabellus* sp. nov. (Vampyrellida, Rhizaria) and identification  
592 of its bacterial endosymbiont, “*Candidatus Megaira polyxenophila*” (*Rickettsiales*,  
593 *Alphaproteobacteria*). Protist. 2017; 168: 109-133. doi: 10.1016/j.protis.2016.11.003.
- 594 22. Yurchenko T, Ševčíková T, Příbyl P, El Karkouri K, Klimeš V, Amaral R, et al. A gene transfer  
595 event suggests a long-term partnership between eustigmatophyte algae and a novel lineage of  
596 endosymbiotic bacteria. ISME J. 2018; 12: 2163-2175. doi: 10.1038/s41396-018-0177-y.
- 597 23. Sun HY, Noe J, Barber J, Coyne RS, Cassidy-Hanley D, Clark TG, et al. Endosymbiotic bacteria  
598 in the parasitic ciliate *Ichthyophthirius multifiliis*. Appl Environ Microbiol. 2009; 75: 7445-7452. doi:  
599 10.1128/AEM.00850-09.
- 600 24. Zaila KE, Doak TG, Ellerbrock H, Tung C-H, Martins ML, Kolbin D, et al. Diversity and  
601 universality of endosymbiotic *Rickettsia* in the fish parasite *Ichthyophthirius multifiliis*. Front  
602 Microbiol. 2017; 8: 189. doi: 10.3389/fmicb.2017.00189.
- 603 25. Ferrantini F, Fokin SI, Modeo L, Andreoli I, Dini F, Görtz HD, et al. “*Candidatus Cryptoprodotis*  
604 polytropus,” A novel *Rickettsia*-like organism in the ciliated protist *Pseudomicrothorax dubius*  
605 (Ciliophora, Nassophorea). J Eukaryot Microbiol. 2009; 56: 119-129. doi: 10.1111/j.1550-  
606 7408.2008.00377.x.
- 607 26. Boscaro V, Fokin SI, Schrällhammer M, Schweikert M, Petroni G. Revised systematics of  
608 *Holospira*-like bacteria and characterization of “*Candidatus Gortzia infectiva*,” a novel  
609 macronuclear symbiont of *Paramecium jenningsi*. Microb Ecol. 2013; 65: 255-267. doi:  
610 10.1007/s00248-012-0110-2.
- 611 27. Schrällhammer M, Ferrantini F, Vannini C, Galati S, Schweikert M, Görtz HD, et al. “*Candidatus*  
612 *Megaira polyxenophila*” gen. nov., sp. nov.: considerations on evolutionary history, host range and  
613 shift of early divergent rickettsiae. PLoS ONE. 2013; 8: e72581. Available from:  
614 <https://doi.org/10.1371/journal.pone.0072581>.

- 615 28. Vannini C, Boscaro V, Ferrantini F, Benken K, Mironov T, Schweikert M, et al. Flagellar  
616 movement in two bacteria of the family *Rickettsiaceae*: a re-evaluation of motility in the evolutionary  
617 perspective. PloS One; 2014. Available from: <https://doi.org/10.1371/journal.pone.0087718>.
- 618 29. Senra MVX, Dias RPJ, Castelli M, Silva-Neto I-D, Verni F, Soares CAG. A house for two-  
619 double bacterial infection in *Euplotes woodruffi* Sq1 (Ciliophora, Euplotia) sampled in southeastern  
620 Brazil. Microb Ecol. 2016; 71: 505-517. doi: 10.1007/s00248-015-0668-6.
- 621 30. Szokoli F, Castelli M, Sabaneyeva E, Schrollhammer M, Krenek S, Doak T, et al. Disentangling  
622 the taxonomy of *Rickettsiales* and description of two novel symbionts (“*Candidatus* Bealeia  
623 paramacronuclearis” and “*Candidatus* Fokinia cryptica”) sharing the cytoplasm of the ciliate protist  
624 *Paramecium biaurelia*. Appl Environ Microbiol. 2016a; 82: 7236-7247. doi: 10.1128/AEM.02284-  
625 16.
- 626 31. Szokoli F, Sabaneyeva E, Castelli M, Krenek S, Schrollhammer M, Soares C, et al. “*Candidatus*  
627 Fokinia solitaria”, a novel “stand-alone” symbiotic lineage of *Midichloriaceae* (*Rickettsiales*). PLoS  
628 One, 2016b; 11: e0145743. Available from: <https://doi.org/10.1371/journal.pone.0145743>.
- 629 32. Castelli M, Serra V, Senra MVX, Basuri CK, Soares CAG, Fokin SI, et al. The hidden world of  
630 *Rickettsiales* symbionts: “*Candidatus* Spectririckettsia obscura,” a novel bacterium found in Brazilian  
631 and Indian *Paramecium caudatum*. Microb Ecol. 2019b; 77: 748-758. doi: 10.1007/s00248-018-  
632 1243-8.
- 633 33. Lanzoni O, Sabaneyeva E, Modeo L, Castelli M, Lebedeva N, Verni F, et al. Diversity and  
634 environmental distribution of the cosmopolitan endosymbiont “*Candidatus* Megaira”. Sci Rep. 2019;  
635 9: 1179. doi: 10.1038/s41598-018-37629-w.
- 636 34. Fraune S, Bosch TC. Long-term maintenance of species-specific bacterial microbiota in the basal  
637 metazoan *Hydra*. P Natl Acad Sci USA. 2007; 104: 13146-13151. doi: 10.1073/pnas.0703375104.
- 638 35. Sunagawa S, DeSantis TZ, Piceno YM, Brodie EL, DeSalvo MK, Voolstra CR, et al.  
639 Bacterial diversity and White Plague Disease-associated community changes in the Caribbean coral  
640 *Montastraea faveolata*. ISME J. 2009; 3: 512-521. doi: 10.1038/ismej.2008.131.

- 641 36. Murakami T, Segawa T, Dial R, Takeuchi N, Kohshima S, Hongoh Y. Bacterial microbiota  
642 associated with the Glacier ice worm is dominated by both worm-specific and Glacier-derived  
643 facultative lineages. *Microbes Environ.* 2017; 32: 32-39. doi: 10.1264/jsme2.ME16158.
- 644 37. Dishaw LJ, Flores-Torres J, Lax S, Gemayel K, Leigh B, Melillo D, et al. The gut of  
645 geographically disparate *Ciona intestinalis* harbors a core microbiota. *PLoS One.* 2014; 9, e93386.  
646 Available from: <https://doi.org/10.1371/journal.pone.0093386>.
- 647 38. Kwan JC, Schmidt W. Bacterial endosymbiosis in a chordate host: long-term co-evolution and  
648 conservation of secondary metabolism. *PLoS ONE.* 2013; 8: e80822. Available from:  
649 <https://doi.org/10.1371/journal.pone.0080822>.
- 650 39. Epis S, Sasser D, Beninati T, Lo N, Beati L, Piesman J, et al. *Midichloria mitochondrii* is  
651 widespread in hard ticks (Ixodidae) and resides in the mitochondria of phylogenetically diverse  
652 species. *Parasitology.* 2008; 13: 485-494. doi: 10.1017/S0031182007004052.
- 653 40. Driscoll T, Gillespie JJ, Nordberg EK, Azad AF, Sobral BW. Bacterial DNA sifted from the  
654 *Trichoplax adhaerens* (Animalia: Placozoa) genome project reveals a putative rickettsial  
655 endosymbiont. *Genome Biol. Evol* 2013; 5: 621-645. doi: 10.1093/gbe/evt036.
- 656 41. Friedman CS, Andree KB, Beauchamp KA, Moore JD, Robbins TT, Shields JD, et al.  
657 “*Candidatus Xenohalictis californiensis*”, a newly described pathogen of abalone, *Haliotis* spp.,  
658 along the west coast of North America. *Int J Syst Evol Microbiol.* 2000; 50: 847-855. doi:  
659 10.1099/00207713-50-2-847.
- 660 42. Crosson LM, Wight N, Van Blaricom GR, Kiryu I, Moore JD, Friedman CS. Abalone withering  
661 syndrome: distribution, impacts, current diagnostic methods and new findings. *Dis Aquat Organ.*  
662 2014; 108: 261-270. doi: 10.3354/dao02713.
- 663 43. Sun J, Wu X Histology, ultrastructure, and morphogenesis of a rickettsia-like organism causing  
664 disease in the oyster, *Crassostrea ariakensis* Gould. *J Invertebr Pathol.* 2004; 86: 77-86. doi:  
665 10.1016/j.jip.2004.04.004.

- 666 44. Ross PM, Pande A, Jones JB, Cope J, Flowers G. First detection of gas bubble disease and  
667 *Rickettsia*-like organisms in *Paphies ventricosa*, a New Zealand surf clam. J Fish Dis. 2018; 41: 187-  
668 190. doi: 10.1111/jfd.12684.
- 669 45. Loy JK, Dewhirst FE, Weber W, Frelier PF, Garbar TL, Tasca SI, et al. Molecular phylogeny  
670 and *in situ* detection of the etiologic agent of necrotizing hepatopancreatitis in shrimp. Appl Environ  
671 Microbiol. 1996; 62: 3439-3445.
- 672 46. Longshaw M. Diseases of crayfish: A review. J Invertebr Pathol. 2011; 106: 54-70. doi:  
673 10.1016/j.jip.2010.09.013.
- 674 47. Wang W. Bacterial diseases of crabs: A review. J Invertebr Pathol. 2011; 106: 18-26. doi:  
675 10.1016/j.jip.2010.09.018.
- 676 48. Athanassopoulou F, Groman D, Prapas T, Sabatakou O. Pathological and epidemiological  
677 observations on rickettsiosis in cultured sea bass (*Dicentrarchus labrax* L.) from Greece. J Appl  
678 Ichthyol. 2004; 20: 525-529. doi: 10.1111/j.1439-0426.2004.00571.x.
- 679 49. Corbeil S, Hyatt AD, Crane MStJ. Characterisation of an emerging rickettsia-like organism in  
680 Tasmanian farmed Atlantic salmon *Salmo salar*. Dis Aquat Organ. 2005; 64: 37-44. doi:  
681 10.3354/dao064037.
- 682 50. Timur G, Erkan M, Yardimci RE, Ercan MD, Çanak O, Ürkü Ç. Light and electron microscopic  
683 study of rickettsia-like organisms causing systemic granulomas in farmed sea bass (*Dicentrarchus*  
684 *labrax*). Isr J Aquacult Bamid. 2013; 65: 874-880
- 685 51. Fryer JL, Lannan CN, Giovannoni SJ, Wood ND. *Piscirickettsia salmonis* gen. nov., sp. nov.,  
686 the causative agent of an epizootic disease in salmonid fishes. Int J Syst Bacteriol. 1992; 42: 120-126.  
687 doi: 10.1099/00207713-42-1-120.
- 688 52. Tan CK, Owens L. Infectivity, transmission and 16S rRNA sequencing of a rickettsia, *Coxiella*  
689 *cheraxi* sp. nov., from the freshwater crayfish *Cherax quadricarinatus*. Dis Aquat Organ. 2000; 41:  
690 115-122. doi: 10.3354/dao041115.

- 691 53. Lloyd SJ, La Patra SE, Snekvik KR, St-Hilaire S, Cain KD, Call DR. Strawberry disease lesions  
692 in rainbow trout from southern Idaho are associated with DNA from a *Rickettsia*-like organism. Dis  
693 Aquat Organ. 2008; 82: 111-118. doi: 10.3354/dao01969.
- 694 54. Cafiso A, Sassera D, Serra V, Bandi C, McCarthy U, Bazzocchi C. Molecular evidence for a  
695 bacterium of the family Midichloriaceae (order *Rickettsiales*) in skin and organs of the rainbow trout  
696 *Oncorhynchus mykiss* (Walbaum) affected by red mark syndrome. J Fish Dis. 2015; 39: 497-450. doi:  
697 10.1111/jfd.12371.
- 698 55. Barker J, Brown MR. Trojan horses of the microbial world: Protozoa and the survival of bacterial  
699 pathogens in the environment. Microbiology. 1994; 140 (Pt 6): 1253-1259. doi: 10.1099/00221287-  
700 140-6-1253.
- 701 56. Gao LY, Harb OS, Abu Kwaik Y. Utilization of similar mechanisms by *Legionella pneumophila*  
702 to parasitize two evolutionarily distant host cells, mammalian macrophages and protozoa. Infect  
703 Immun. 1997; 65: 4738-4746.
- 704 57. Görtz H-D, Brügge T. Intracellular bacteria in protozoa. Naturwissenschaften. 1998; 85: 359-368.
- 705 58. Harb OS, Gao LY, Abu Kwaik Y. From protozoa to mammalian cells: A new paradigm in the life  
706 cycle of intracellular bacterial pathogens. Environ Microbiol. 2000; 2: 251-265. doi: 10.1046/j.1462-  
707 2920.2000.00112.x.
- 708 59. Horn M, Wagner M. Bacterial endosymbionts of free-living amoebae. J Eukaryot Microbiol.  
709 2004; 51: 509-514. doi: 10.1111/j.1550-7408.2004.tb00278.x.
- 710 60. Molmeret M, Horn M, Wagner M, Santic M, Abu Kwaik Y. Amoebae as training grounds for  
711 intracellular bacterial pathogens. Appl Environ Microbiol. 2005; 71: 20-28. doi:  
712 [10.1128/AEM.71.1.20-28.2005](https://doi.org/10.1128/AEM.71.1.20-28.2005).
- 713 61. Taylor-Mulneix DL, Bendor L, Linz B, Rivera I, Ryman VE, Dewan KK, et al. *Bordetella*  
714 *bronchiseptica* exploits the complex life cycle of *Dictyostelium discoideum* as an amplifying  
715 transmission vector. PLoS Biol. 2017; 15: e2000420. Available from:  
716 <https://dx.doi.org/10.1371/journal.pbio.2000420>.

- 717 62. Gollas-Galván T, Avila-Villa LA, Martínez-Porchas M, Hernandez-Lopez J. *Rickettsia*-like  
718 organisms from cultured aquatic organisms, with emphasis on necrotizing hepatopancreatitis  
719 bacterium affecting penaeid shrimp: An overview on an emergent concern. Rev Aquacult. 2014; 6:  
720 256-269. doi: 10.1111/raq.12043.
- 721 63. Sabaneyeva E, Castelli M, Szokoli F, Benken K, Lebedeva N, Salvetti A, et al. Host and symbiont  
722 intraspecific variability: the case of *Paramecium calkinsi* and “*Candidatus* Trichorickettsia mobilis”.  
723 Europ J Protistol. 2018; 62: 79-94. doi: 10.1016/j.ejop.2017.12.002.
- 724 64. González-Estévez C. Autophagy meets planarians. Autophagy. 2009; 5: 290-297. doi:  
725 [10.4161/auto.5.3.7665](https://doi.org/10.4161/auto.5.3.7665).
- 726 65. Petersen CH. Planarian resistance to blades and bugs. Cell Host Microbe. 2014; 16: 271-272.  
727 doi: 10.1016/j.chom.2014.08.016.
- 728 66. Rossi L, Salvetti A, Batistoni R, Deri P, Gremigni V. Planarians, a tale of stem cells. Cell Mol  
729 Life Sci. 2008; 65: 16-23. doi: 10.1007/s00018-007-7426-y.
- 730 67. Abnave P, Mottola G, Gimenez G, Boucherit N, Trouplin V, Torre C, et al. Screening in  
731 planarians identifies MORN2 as a key component in LC3-associated phagocytosis and resistance to  
732 bacterial infection. Cell Host & Microbe. 2014; 16: 338-350. doi: 10.1016/j.chom.2014.08.002.
- 733 68. Conti F, Abnave P, Ghigo E. Unconventional animal models: a booster for new advances in host-  
734 pathogen interactions. Front Cell Infect Microbiol. 2014; 4: 142. doi: [10.3389/fcimb.2014.00142](https://doi.org/10.3389/fcimb.2014.00142).
- 735 69. Torre C, Ghigo É. La planaire: un ver immortel pour élucider la réponse immunitaire de l’homme  
736 [Planaria: an immortal worm to clarify human immune response]. Med Sci (Paris). 2015; 31: 20-22.  
737 [Article in French]. doi: 10.1051/medsci/20153101006.
- 738 70. Arnold CP, Merryman MS, Harris-Arnold A, McKinney SA, Seidel CW, Loethen S, et al.  
739 Pathogenic shifts in endogenous microbiota impede tissue regeneration via distinct activation of  
740 TAK1/MKK/p38. eLife. 2016; 5: e16793. Available from: <https://doi.org/10.7554/eLife.16793>.
- 741 71. Torre C, Abnave P, Tsoumtsia LL, Mottola G, Lepolard C, Trouplin V, et al. *Staphylococcus*  
742 *aureus* promotes Smed-PGRP-2/Smed-setd8-1 methyltransferase signalling in planarian neoblasts to

- 743 sensitize anti-bacterial gene responses during re-infection. *EBioMedicine*. 2017; 20: 150-160. doi:  
744 10.1016/j.ebiom.2017.04.031.
- 745 72. Tsoumtsa LL, Torre C, Trouplin V, Coiffard B, Gimenez G, Mege JL, et al. Antimicrobial  
746 capacity of the freshwater planarians against *S. aureus* is under the control of timeless. *Virulence*.  
747 2017; 4:1-10. doi: 10.1080/21505594.2016.1276689.
- 748 73. Krenek S, Berendonk TU, Petzoldt T. Thermal performance curves of *Paramecium caudatum*: a  
749 model selection approach. *Eur J Protistol*. 2011; 47: 124-137. doi: 10.1016/j.ejop.2010.12.001.
- 750 74. Modeo L, Fokin SI, Boscaro V, Andreoli I, Ferrantini F, Rosati G, et al. Morphology,  
751 ultrastructure, and molecular phylogeny of the ciliate *Sonderia vorax* with insights into the  
752 systematics of order Plagiopylida. *BMC Microbiol*. 2013a; 13: 40. Available from:  
753 <https://doi.org/10.1186/1471-2180-13-40>.
- 754 75. Nitla V, Serra V, Fokin SI, Modeo L, Verni F, Sandeep BV, et al. Critical revision of the family  
755 Plagiopylidae (Ciliophora: Plagiopylea), including the description of two novel species, *Plagiopyla*  
756 *ramani* and *Plagiopyla narasimhamurthii*, and redescription of *Plagiopyla nasuta* Stein, 1860 from  
757 India. *Zool J Linnean Soc*. 2019; 186: 1-45. doi: 10.1093/zoolinnean/zly041.
- 758 76. Fokin S. *Paramecium* genus: biodiversity, some morphological features and the key to the main  
759 morphospecies discrimination. *Protistology*. 2010/2011; 6: 227-235.
- 760 77. Amann RI, Ludwig W, Schleifer KH. Phylogenetic identification and *in situ* detection of  
761 individual microbial cells without cultivation. *Microbiol Rev*. 1995; 59: 143-169.
- 762 78. Illa K, Shameem U, Serra V, Melai M, Mangam S, Basuri CK, et al. Multidisciplinary  
763 investigation on the catfish parasite *Hamatopeduncularia* Yamaguti, 1953 (Monogenoidea:  
764 Dactylogyridae): Description of two new species from India and phylogenetic considerations. *Europ*  
765 *Zool J*. 2019; 86: 132-155. doi: 10.1080/24750263.2019.1597931.
- 766 79. Barth D, Krenek S, Fokin S, Berendonk T. Intraspecific genetic variation in *Paramecium* revealed  
767 by mitochondrial cytochrome c oxidase I sequences. *J Eukaryot Microbiol*. 2006; 53: 20-25. doi:  
768 10.1111/j.1550-7408.2005.00068.x.

- 769 80. Strüder-Kypke MC, Lynn DH. Comparative analysis of the mitochondrial cytochrome *c* oxidase  
770 subunit I COI gene in ciliates Alveolata, Ciliophora and evaluation of its suitability as a biodiversity  
771 marker. *Syst Biodiv.* 2010; 8: 131-148. doi: 10.1080/14772000903507744.
- 772 81. Medlin L, Elwood HJ, Stickel S, Sogin ML. The characterization of enzymatically amplified  
773 eukaryotic 16S-like rRNA-coding regions. *Gene.* 1988; 71: 491-499.
- 774 82. Petroni G, Dini F, Verni F & Rosati G A molecular approach to the tangled intrageneric  
775 relationships underlying phylogeny in *Euplotes* (Ciliophora, Spirotrichea). *Mol Phylogenet Evol.*  
776 2002; 22: 118-130. doi: 10.1006/mpev.2001.1030.
- 777 83. Boscaro V, Fokin SI, Verni F, Petroni G. Survey of *Paramecium duboscqui* using three markers  
778 and assessment of the molecular variability in the genus *Paramecium*. *Mol Phylogenet Evol.* 2012;  
779 65: 1004-1013. doi: 10.1016/j.ympev.2012.09.001.
- 780 84. Vannini C, Rosati G, Verni F, Petroni G. Identification of the bacterial endosymbionts of the  
781 marine ciliate *Euplotes magnicirratu*s (Ciliophora, Hypotrichia) and proposal of “*Candidatus*  
782 *Devosia euplotis*”. *Int J Syst Evol Microbiol.* 2004; 54: 1151-1156. doi: 10.1099/ijs.0.02759-0.
- 783 85. Rosati G, Modeo L, Melai M, Petroni G, Verni F. A multidisciplinary approach to describe  
784 protists: a morphological, ultrastructural, and molecular study on *Peritromus kahli* Villeneuve-  
785 Brachon, 1940 (Ciliophora, Heterotrichea). *J Eukaryot Microbiol.* 2004; 51: 49-59. doi:  
786 10.1111/j.1550-7408.2004.tb00160.x.
- 787 86. Amann RI, Binder BJ, Olson RJ, Chisholm SW, Devereux R, Stahl DA. Combination of 16S  
788 rRNA-targeted oligonucleotide probes with flow cytometry for analyzing mixed microbial  
789 populations. *Appl Environ Microbiol.* 1990; 56: 1919-1925.
- 790 87. Fokin SI, Serra V, Ferrantini F, Modeo L, Petroni G. “*Candidatus Hafkinia simulans*” gen. nov.,  
791 sp. nov., a novel *Holospora*-like bacterium from the macronucleus of the rare brackish water ciliate  
792 *Frontonia salmastra* (Oligohymenophorea, Ciliophora): multidisciplinary characterization of the new  
793 endosymbiont and its host. *Microb. Ecol.* 2019; 1-15. doi: 10.1007/s00248-018-1311-0.
- 794 88. Rossi L, Cassella L, Iacopetti P, Ghezzani C, Tana L, Gimenez G, et al. Insight into stem cell



- 795 regulation from sub-lethally irradiated worms. *Gene*. 2018, 662: 37-45. doi:  
796 [10.1016/j.gene.2018.04.009](https://doi.org/10.1016/j.gene.2018.04.009).
- 797 89. King RS, Newmark PA. *In situ* hybridization protocol for enhanced detection of gene expression  
798 in the planarian *Schmidtea mediterranea*. *BMC Dev Biol*. 2013; 13: 8. Available from:  
799 <https://doi.org/10.1186/1471-213X-13-8>
- 800 90. Modeo L, Petroni G, Lobban CS, Verni F, Vannini C. Morphological, ultrastructural, and  
801 molecular characterization of *Euplotidium rosati* n. sp. (Ciliophora, Euplotida) from Guam. *J*  
802 *Eukaryot Microbiol*. 2013b; 60: 25-36. doi: 10.1111/jeu.12003.
- 803 91. Rossi L, Bonuccelli L, Iacopetti P, Evangelista M, Ghezzani C, Tana L, et al. Prohibitin 2  
804 regulates cell proliferation and mitochondrial cristae morphogenesis in planarian stem cells. *Stem*  
805 *Cell Rev*. 2014; 10: 871-87. doi: 10.1007/s12015-014-9540-1.
- 806 92. Cassella L, Salvetti A, Iacopetti P, Ippolito C, Ghezzani C, et al. Putrescine independent wound  
807 response phenotype is produced by ODC-like RNAi in planarians. *Sci Rep*. 2017; 7: 9736. Available  
808 from: <https://doi.org/10.1038/s41598-017-09567-6>.
- 809 93. Roberts-Galbraith RH, Brubacher JL, Newmark PA. A functional genomics screen in planarians  
810 reveals regulators of whole-brain regeneration. *Elife*. 2016. pii: e17002. Available from:  
811 <https://doi.org/10.7554/eLife.17002>.
- 812 94. Powers JH, Mitchell C. A new species of *Paramecium* (*Paramecium multimicronucleata*)  
813 experimentally determined. *Biol Bull*. 1910; 19: 324-332.
- 814 95. Fokin S. Morphological diversity in the micronuclei in *Paramecium*. *Arch Protistenkd*. 1997;  
815 148: 375-387.
- 816 96. Fokin SI, Chivilev SM. *Paramecium*. Morphometric analysis and taxonomy. *Acta Protozool*.  
817 2000. 39: 1-14
- 818 97. Wichterman R. The biology of *Paramecium*. 2nd edn. New York and London: Plenum Press.  
819 1986.
- 820 98. Allen RD. Cytology. In: Görtz H-D, editor. *Paramecium*. Berlin, Heidelberg, New York:

821 Springer-Verlag; 1988. pp 4-40.

822 99. Gong J, Qing Y, Fu R, Su L, Zhang X, Zhang Q. Protist-Bacteria associations:  
823 Gammaproteobacteria and Alphaproteobacteria are prevalent as digestion-resistant bacteria in  
824 ciliated protozoa. *Front Microbiol.* 2016; 7: 498. Available from:  
825 <https://doi.org/10.3389/fmicb.2016.00498>.

826 100. Chiellini C, Pasqualetti C, Lanzoni O, Fagorzi C, Bazzocchi C, Fani R, et al. 2019. Harmful  
827 effect of *Rheinheimera* sp. EpRS3 (*Gammaproteobacteria*) against the protist *Euplotes aediculatus*  
828 (Ciliophora, Spirotrichea): insights into the ecological role of antimicrobial compounds from  
829 environmental bacterial strains. *Front Microbiol.* 2019; 10: 510. Available from:  
830 <https://doi.org/10.3389/fmicb.2019.00510>.

831 101. Renesto P, Dehoux P, Gouin E, Touqui L, Cossart P, Raoult D. Identification and  
832 characterization of a phospholipase D-superfamily gene in rickettsiae. *J Infect Dis.* 2003; 188: 1276-  
833 1283. doi: 10.1086/379080.

834 102. Gouin E, Egile C, Dehoux P, Villiers V, Adams J, Gertler F, et al. The RickA protein of  
835 *Rickettsia conorii* activates the Arp2/3 complex. *Nature.* 2004; 427: 457-461. doi:  
836 10.1038/nature02318.

837 103. Cardwell MM and Martinez JJ. The Sca2 autotransporter protein from *Rickettsia conorii* is  
838 sufficient to mediate adherence to and invasion of cultured mammalian cells. *Infect Immun.* 2009;  
839 77: 5272-5280. doi: 10.1128/IAI.00201-09.

840 104. Verni F, Rosati G, Nobili R. Infection mechanisms of “eta” killing particles in sensitive cells of  
841 the ciliate *Euplotes crassus*. *Trans Amer Micros Soc.* 1977; 96: 363-369.

842 105. Nunan LM, Noble B, Le Groumellec M, Lightner DV. Experimental infection of *Penaeus*  
843 *vannamei* by a rickettsia-like bacterium (RLB) originating from *P. monodon*. *Dis Aquat Organ.* 2003;  
844 54: 43-48. doi: 10.3354/dao054043.

845

846 **S1\_Supporting information**

847 **S1 Fig. Light microscope observation of *P. multimicronucleatum* strain US\_BI 16I1. (a-c) *In vivo***  
848 specimens; **(d)** Feulgen stained cell. Ma, macronucleus. **(c)** the cytostome (C) at a higher  
849 magnification with trichocysts (T) inserted in the cortex. **(d)** Feulgen staining highlights the Ma and  
850 the three micronuclei (mi). Scale bars stand for 10  $\mu$ m.

851

852 **S2 Fig. TEM pictures of *P. multimicronucleatum* strain US\_BI 16I1. (a, b) cortex with trichocysts**  
853 inserted (T) in resting state **(a)** and about to extrude **(b)**; m, mitochondria. **(c, d)** macronucleus (Ma)  
854 encircled by a layer of rarefied material (asterisk) with endosymbionts (arrows) and nucleoli (n); Ph,  
855 phagosomes. **(e)** Endosymbionts inside the Ma, a transversally sectioned T occurs near Ma  
856 membrane. **(f)** Ma portion and one of the three micronuclei (mi). Scale bars stand for 1  $\mu$ m.

857

858 **S3 Fig. TEM pictures of the intestine of *D. japonica* specimens fixed after feeding with plain**  
859 **liver paste (control animals). (a) day 1 after feeding; (b) day 7 after feeding. L, lumen of planarian**  
860 intestine. Scale bars stand for 1  $\mu$ m.

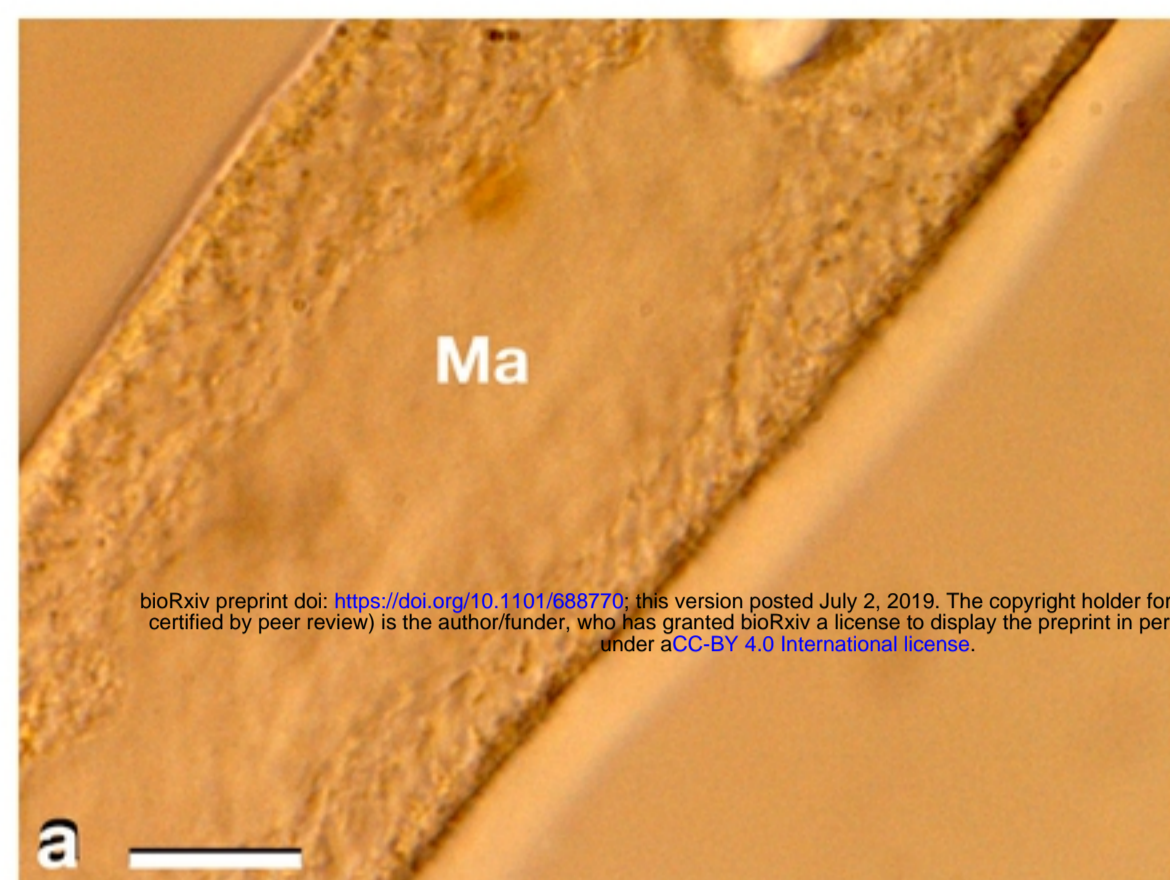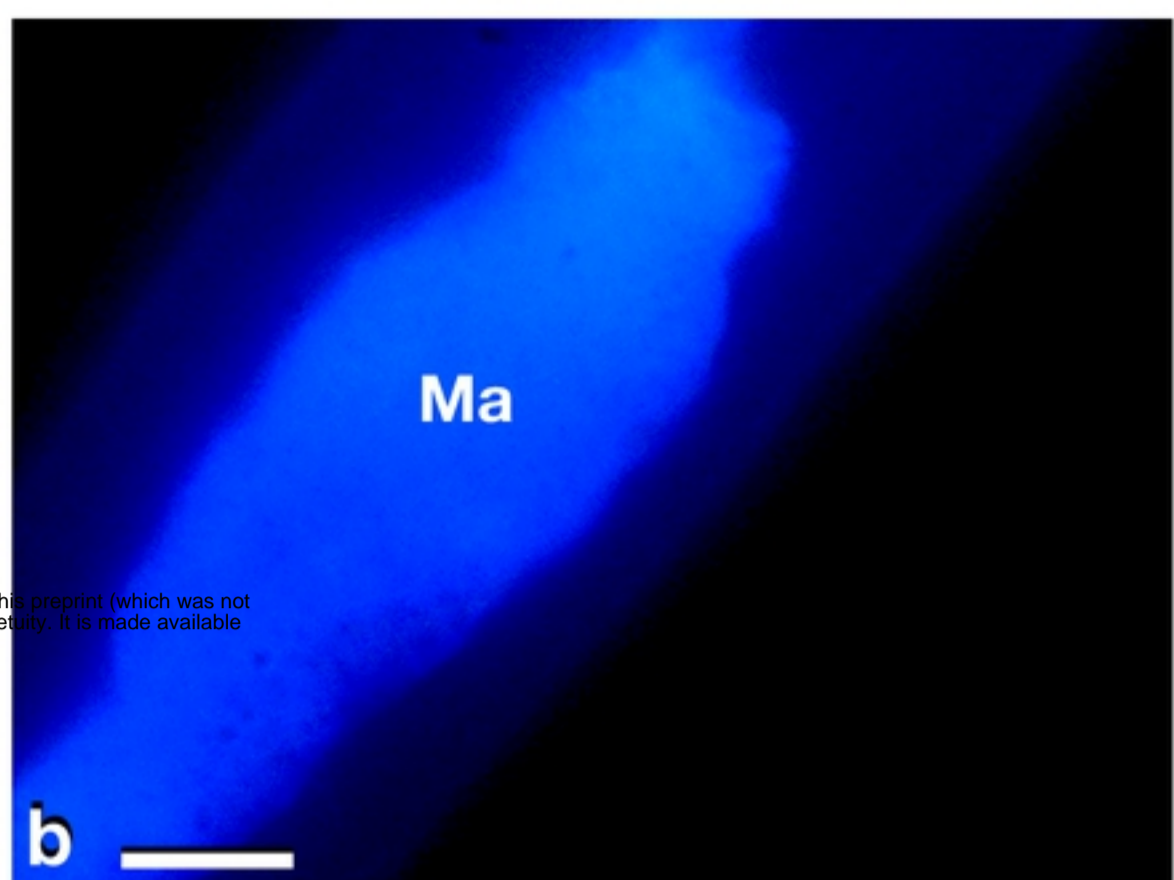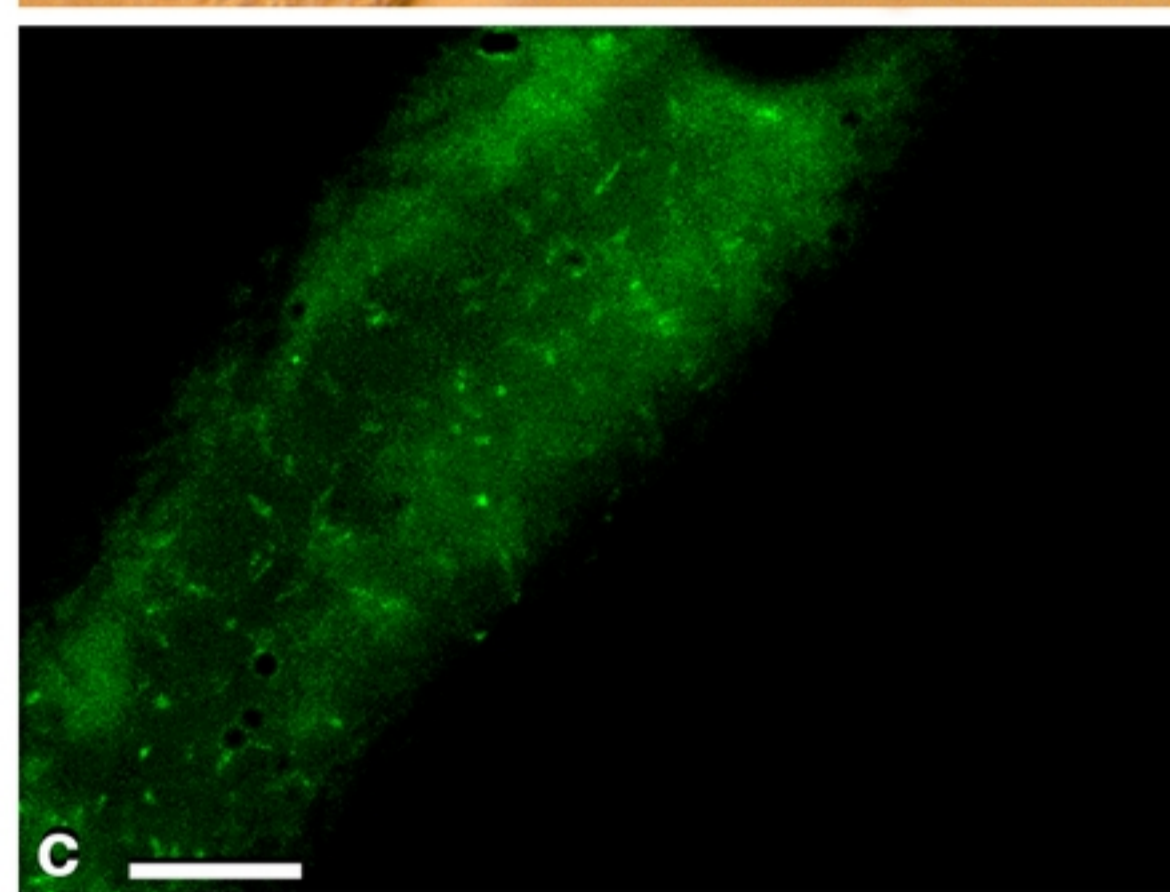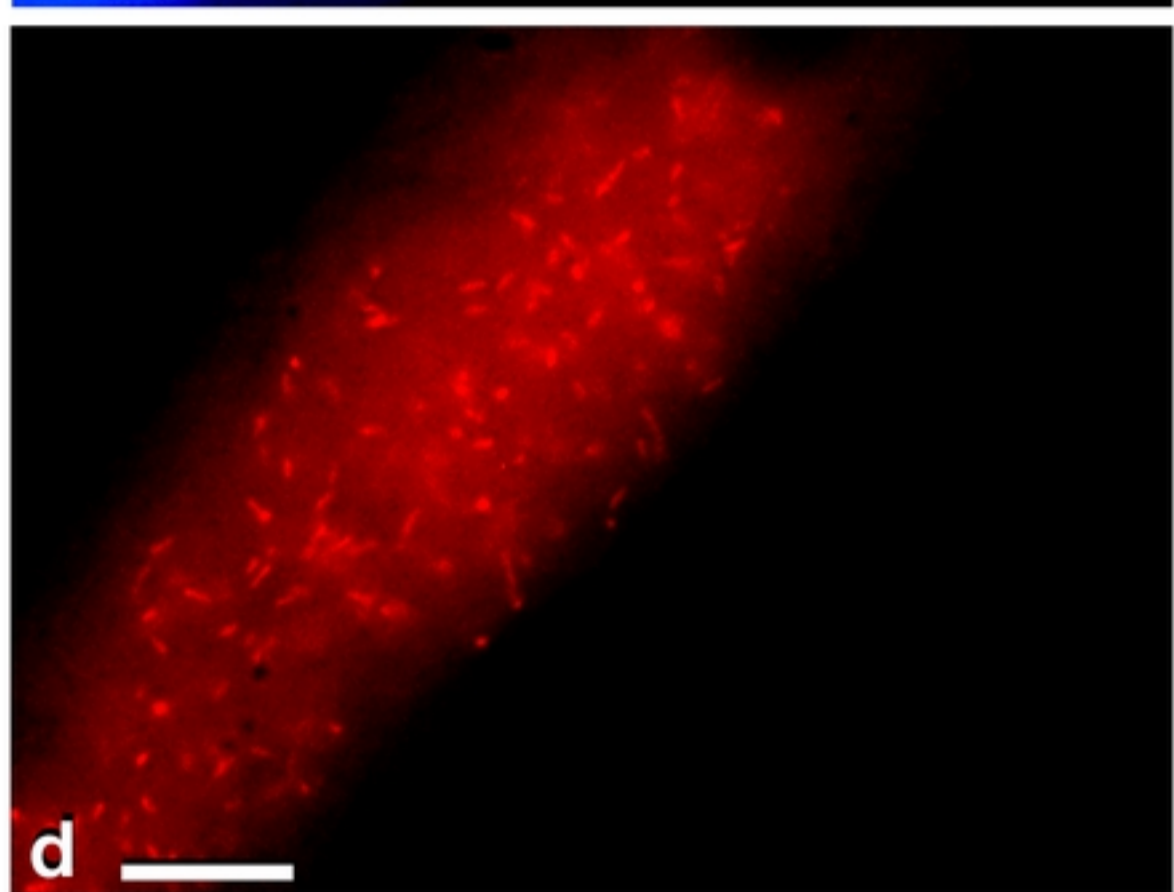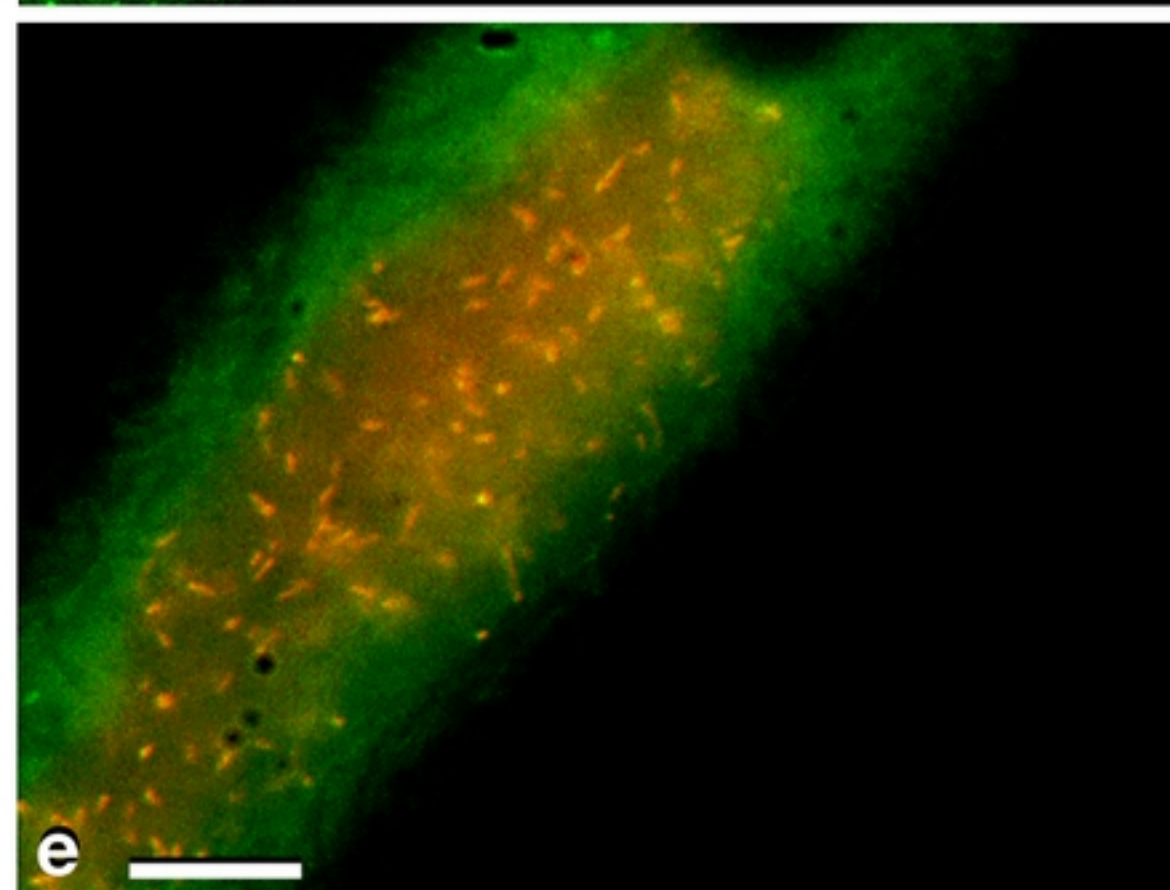

Figure 1

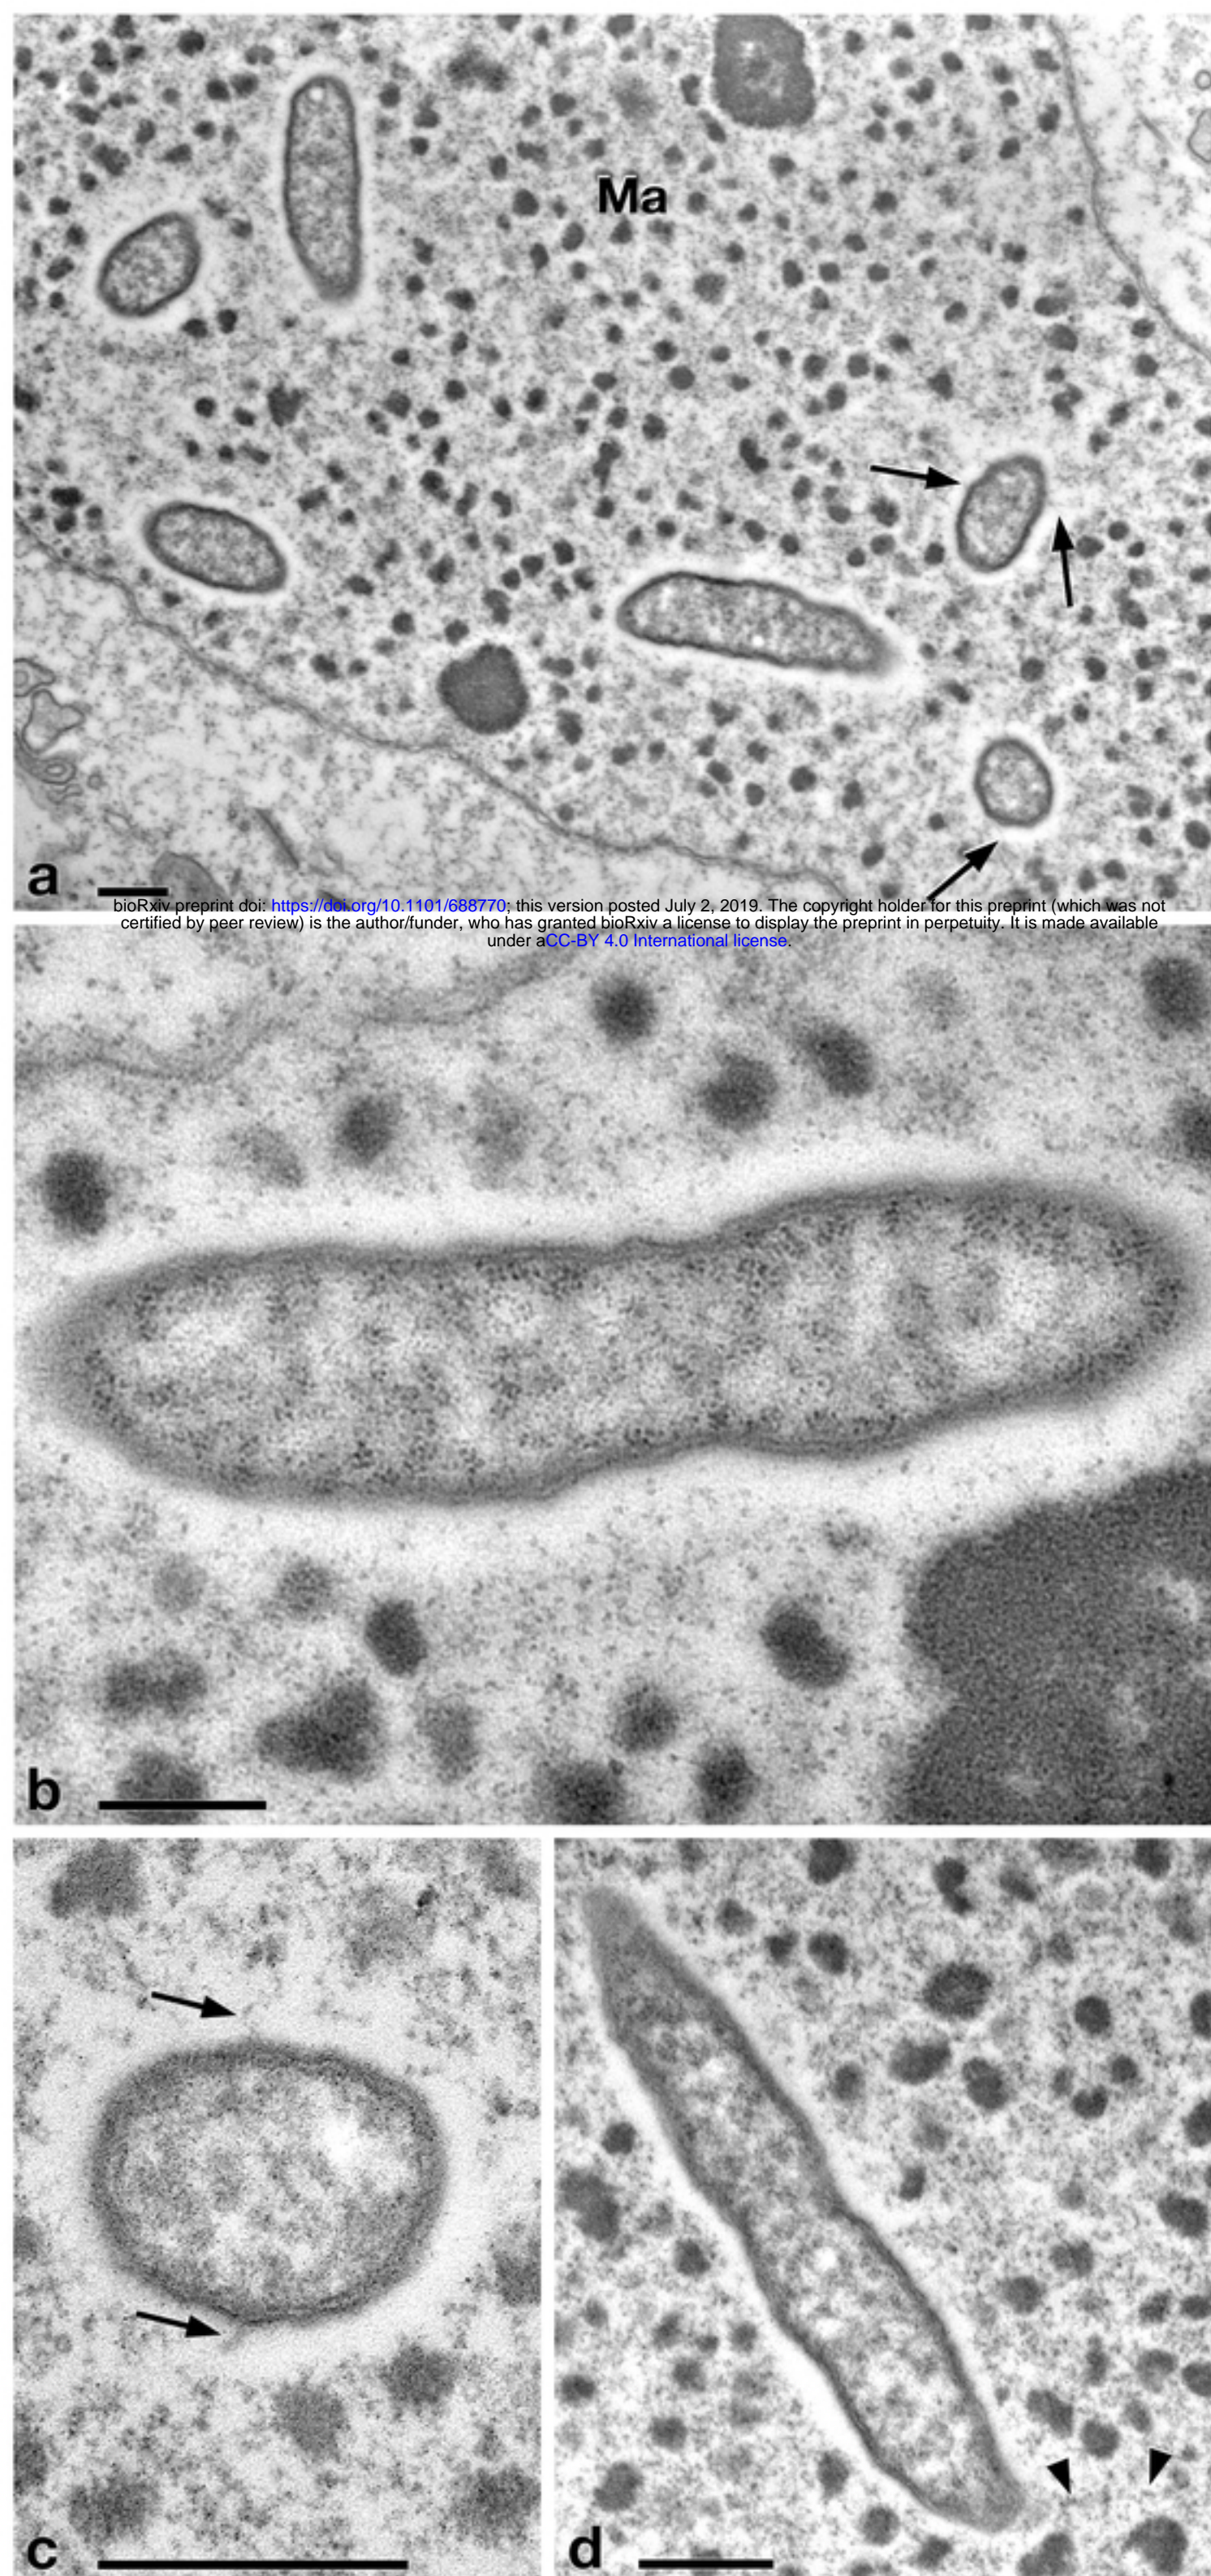

Figure 2

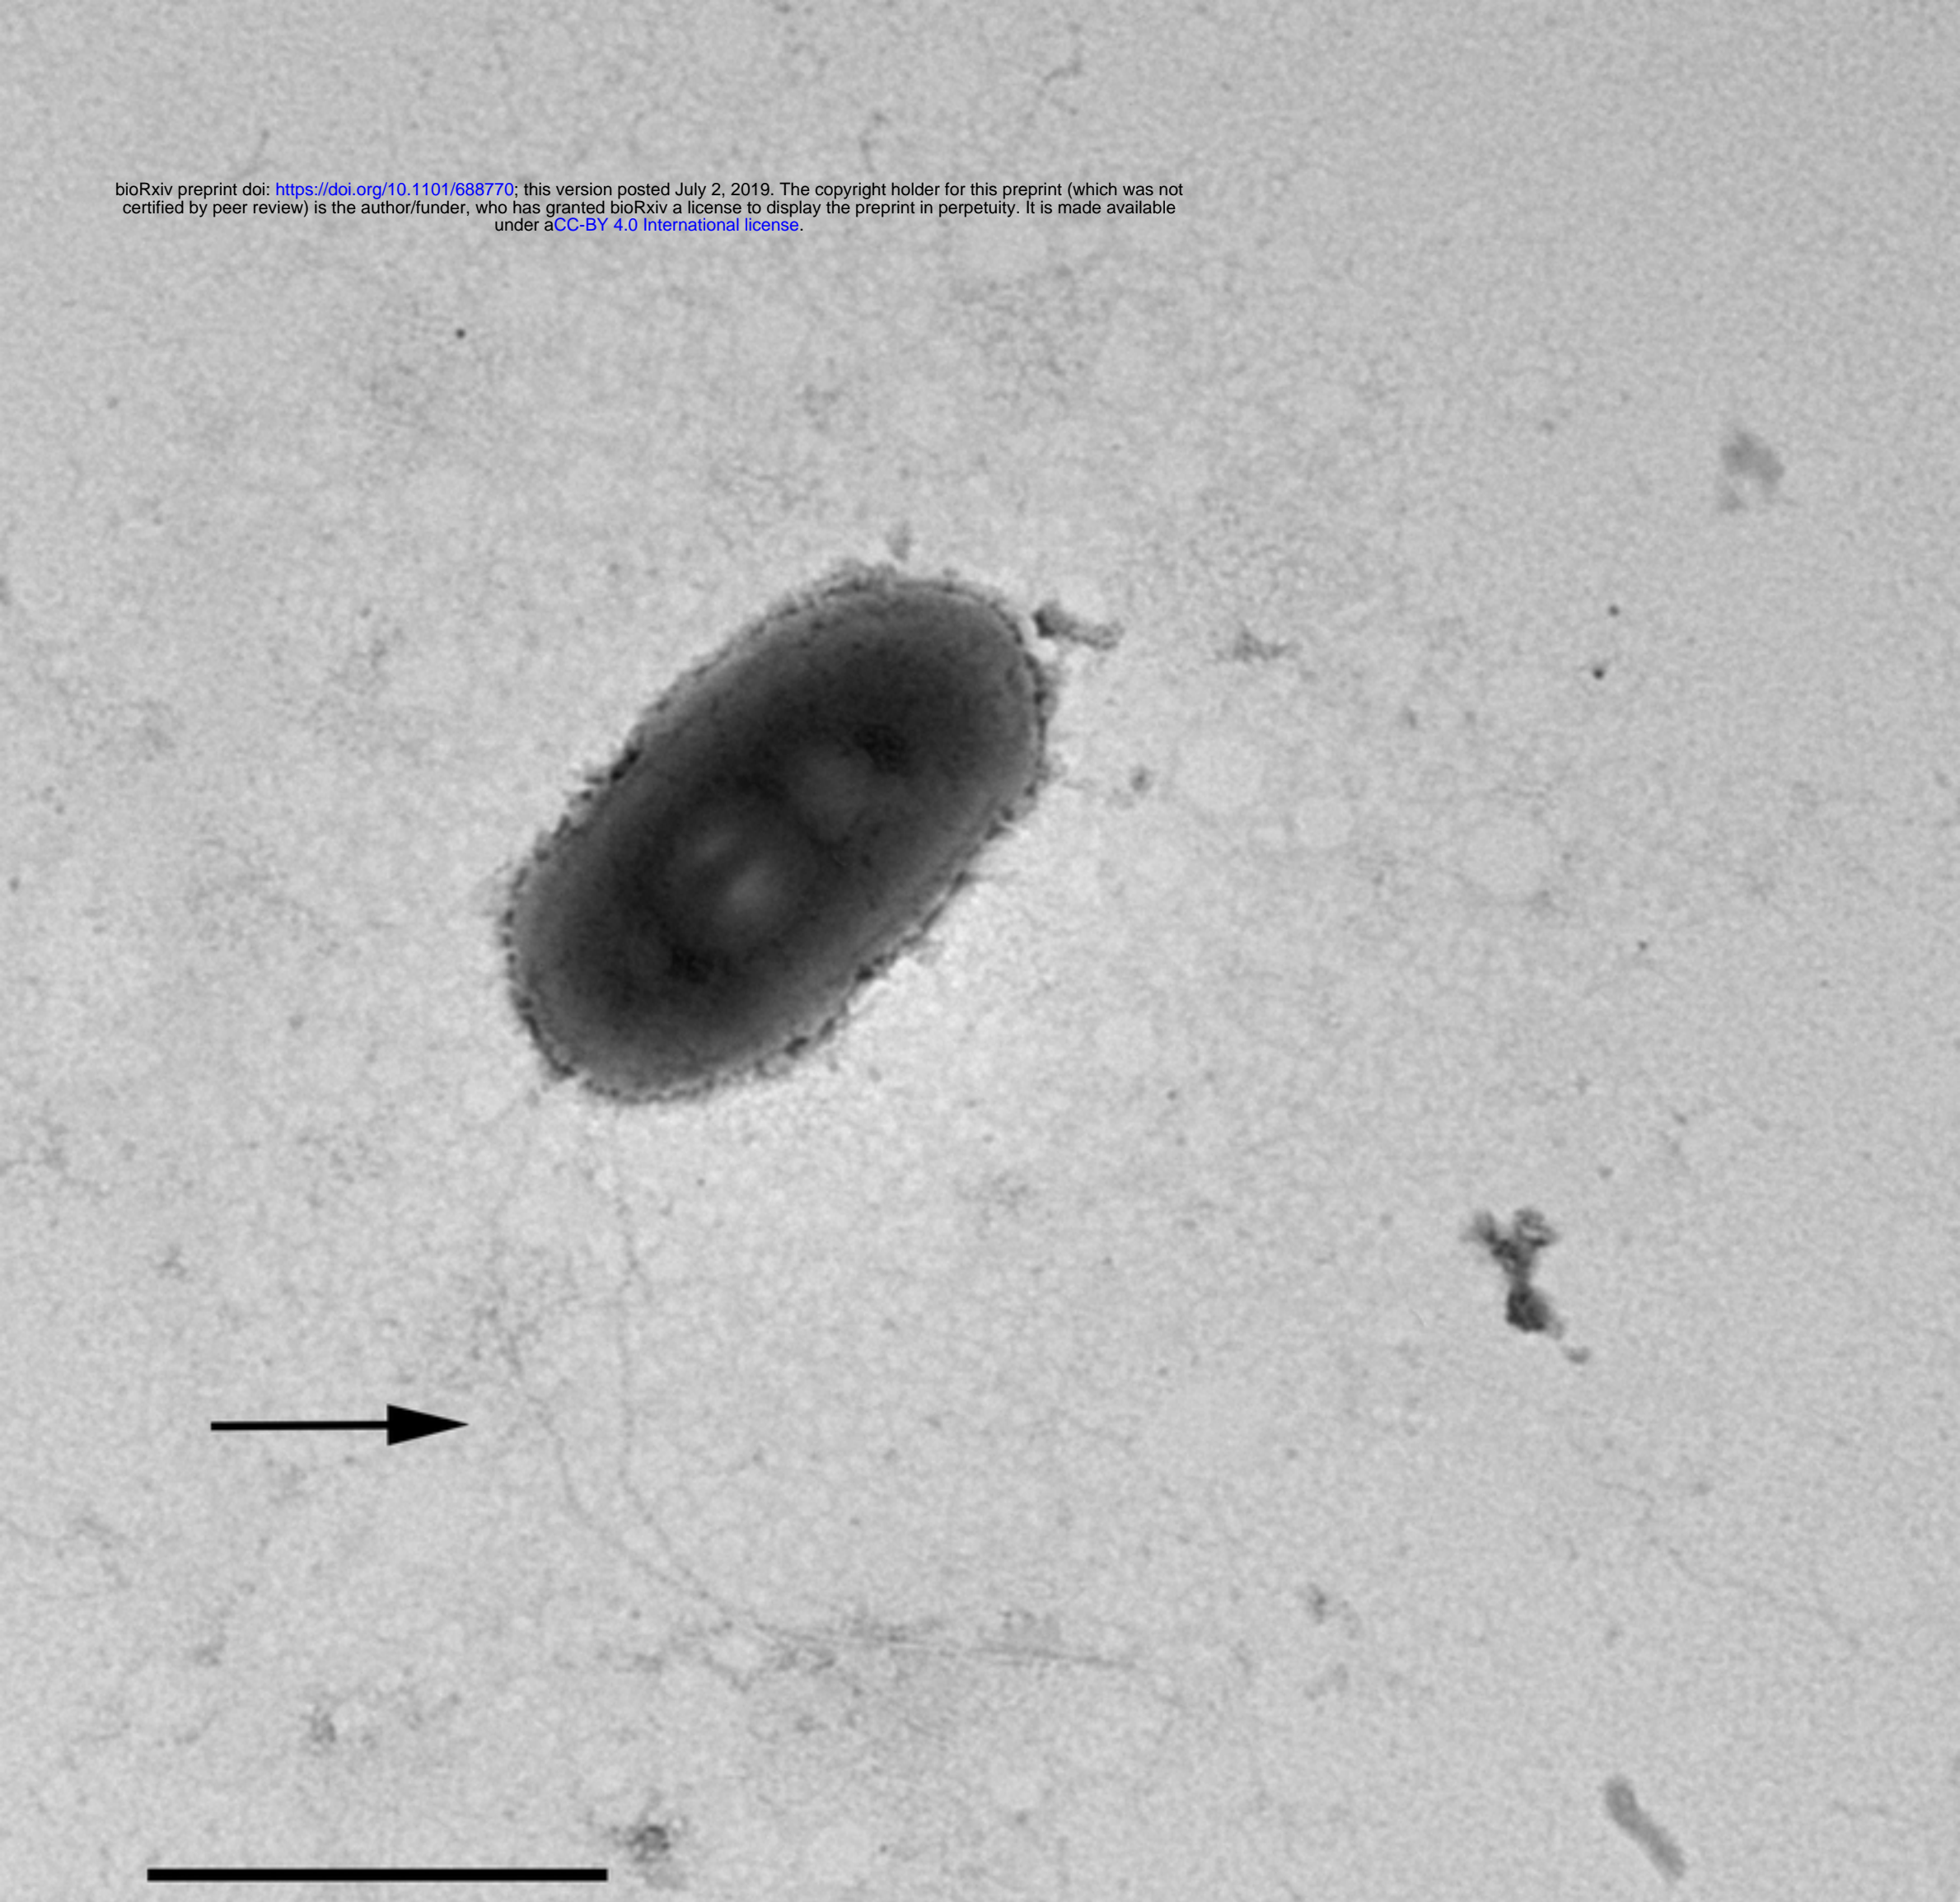

Figure 3

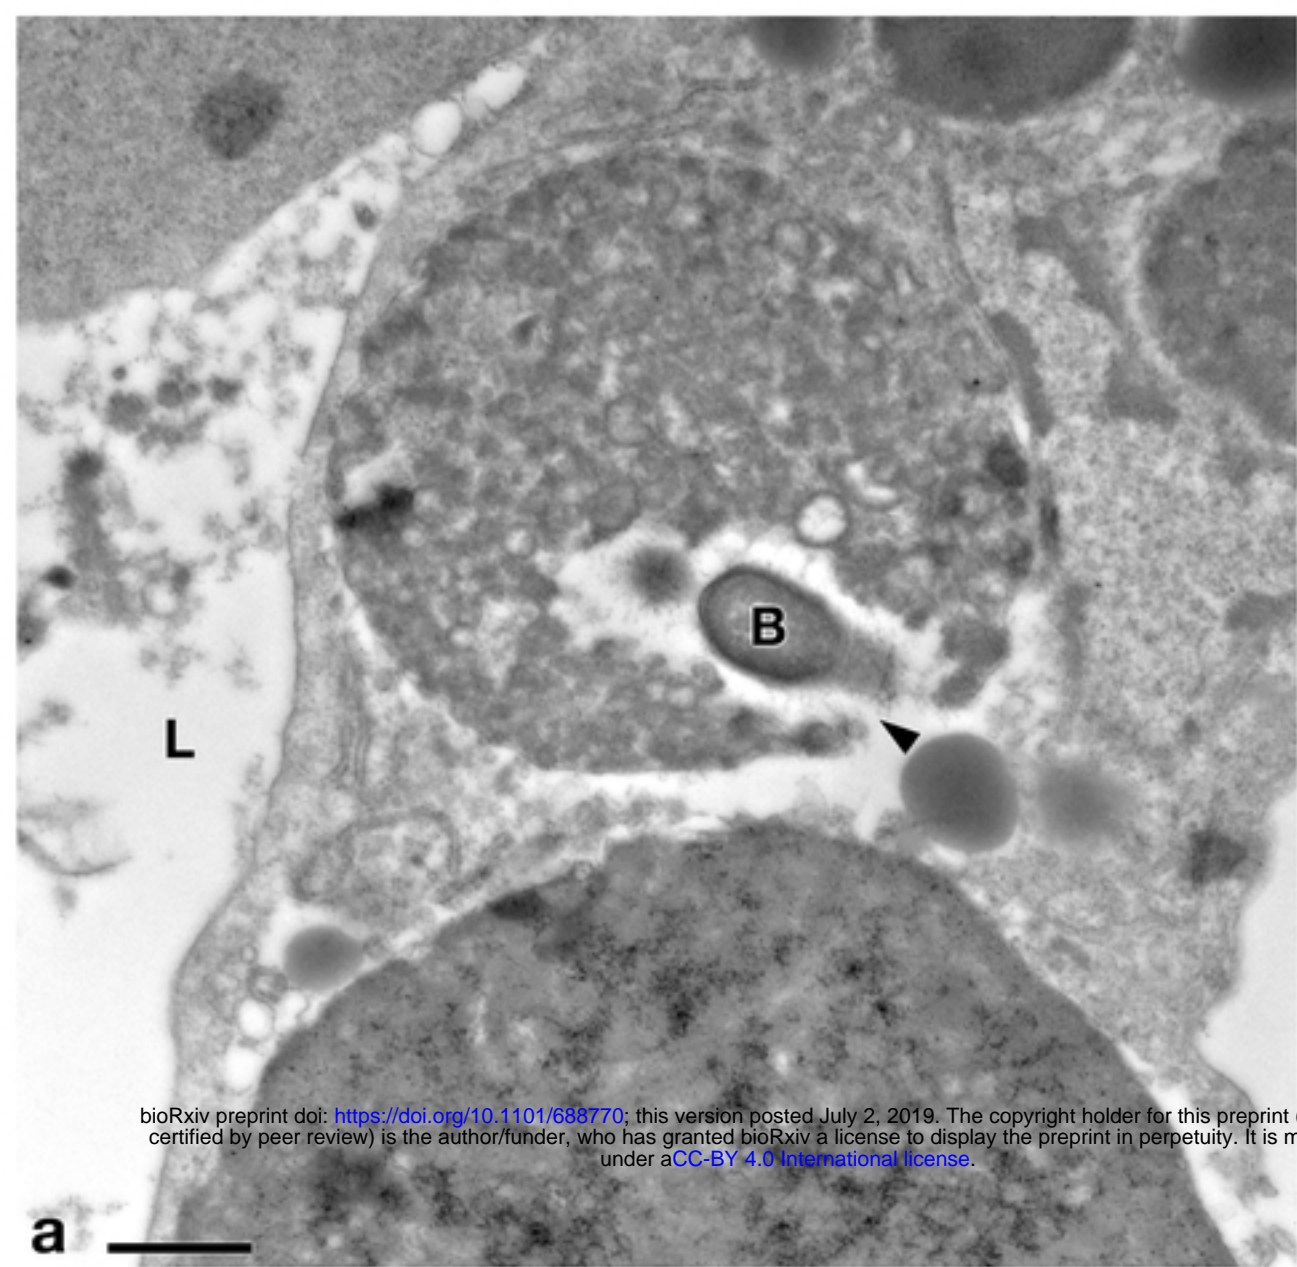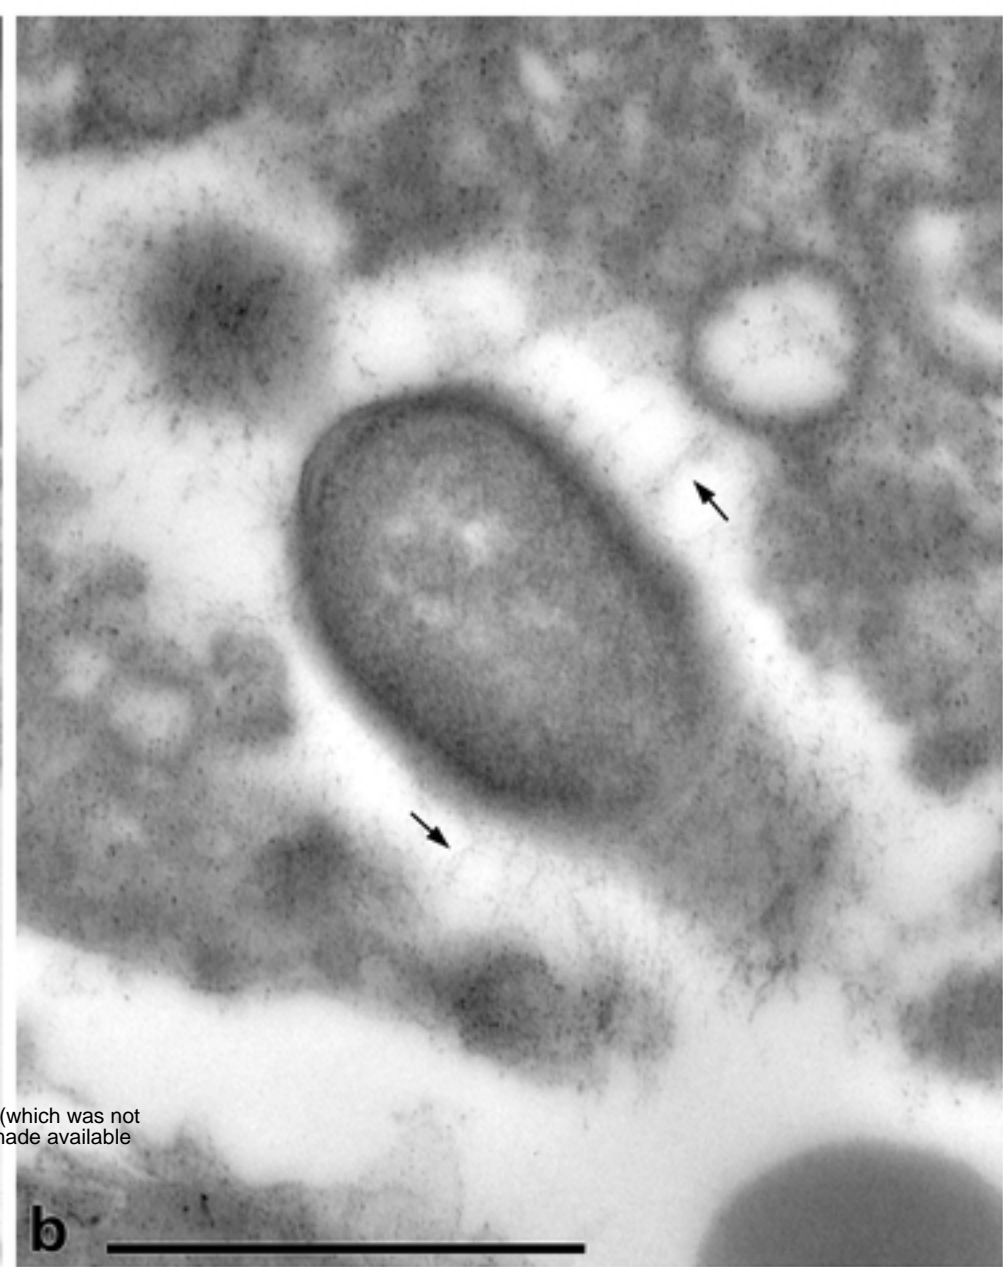

bioRxiv preprint doi: <https://doi.org/10.1101/688770>; this version posted July 2, 2019. The copyright holder for this preprint (which was not certified by peer review) is the author/funder, who has granted bioRxiv a license to display the preprint in perpetuity. It is made available under aCC-BY 4.0 International license.

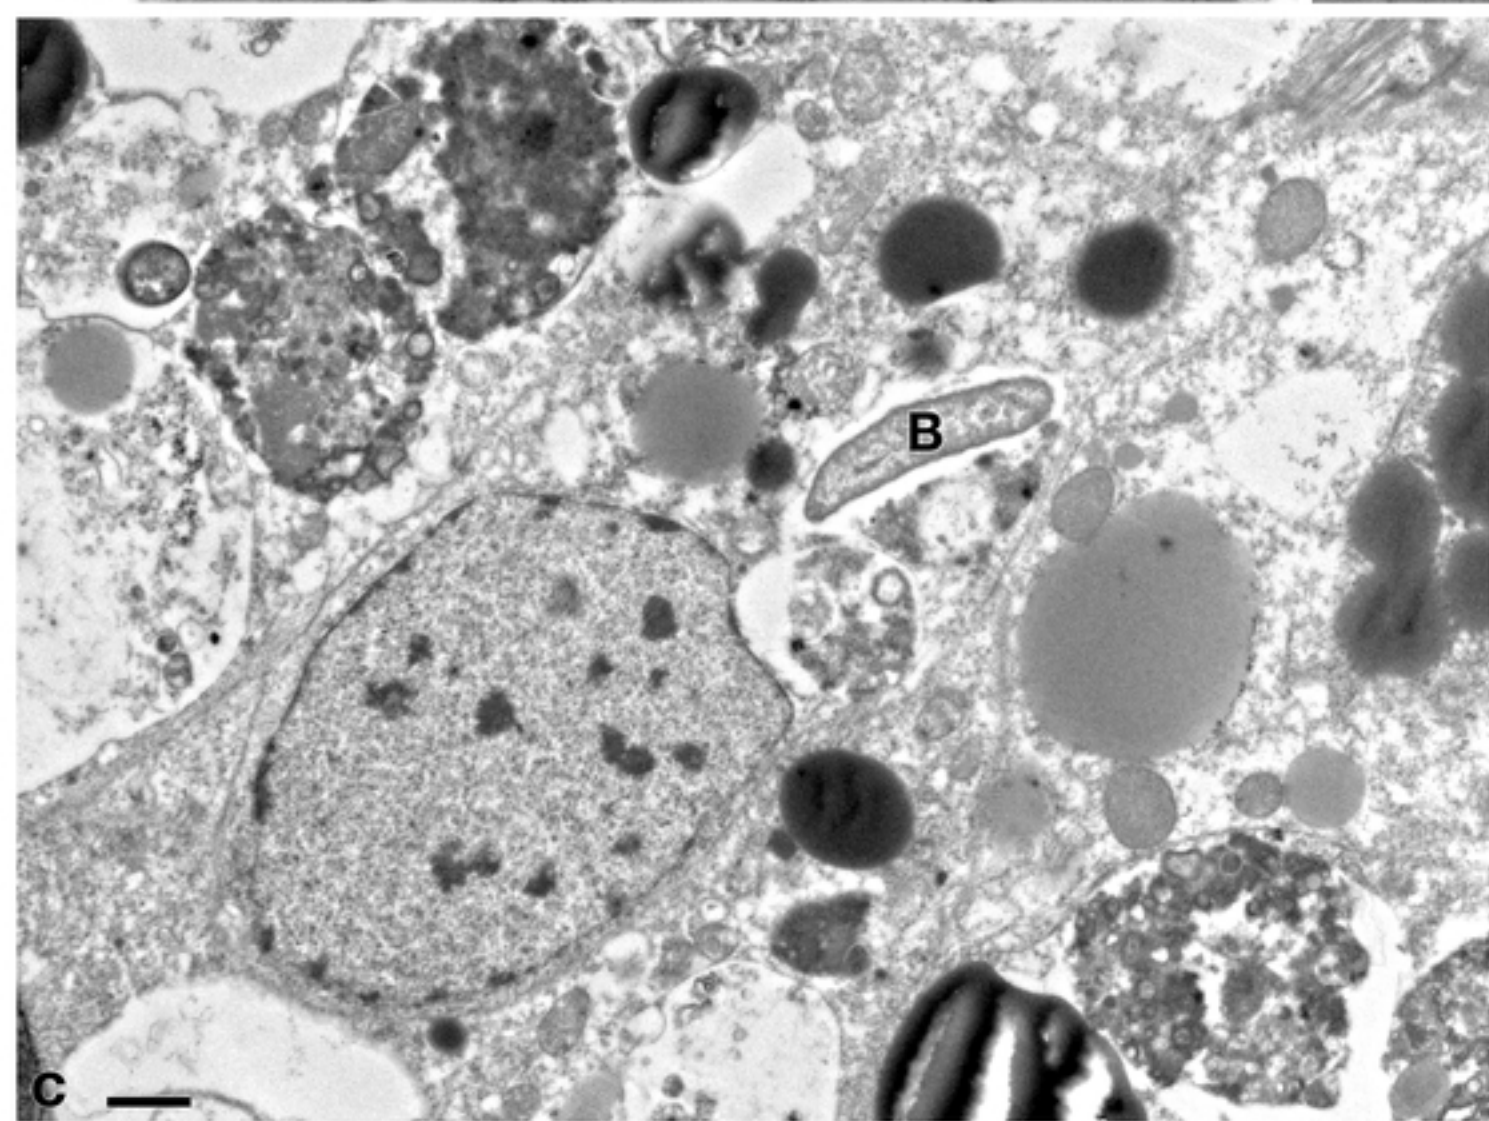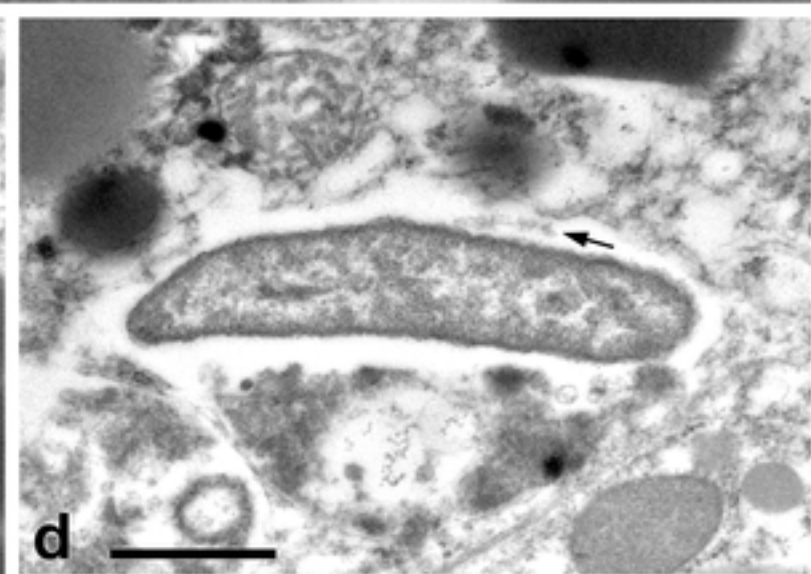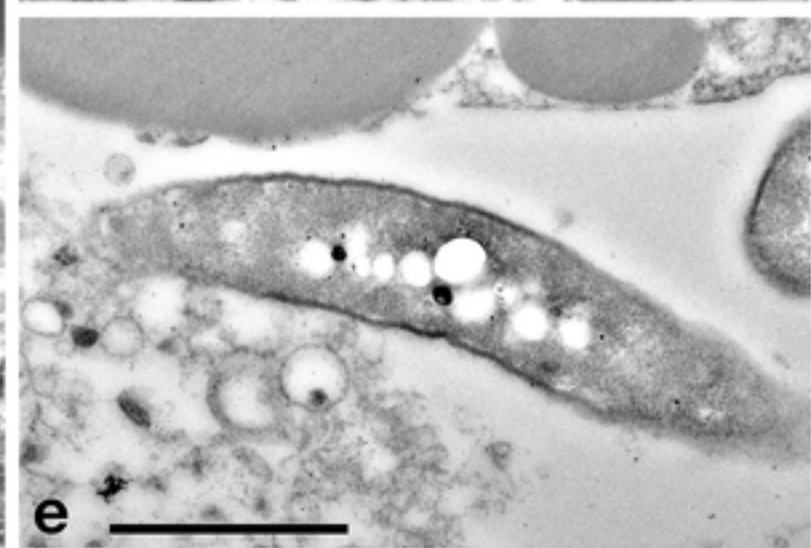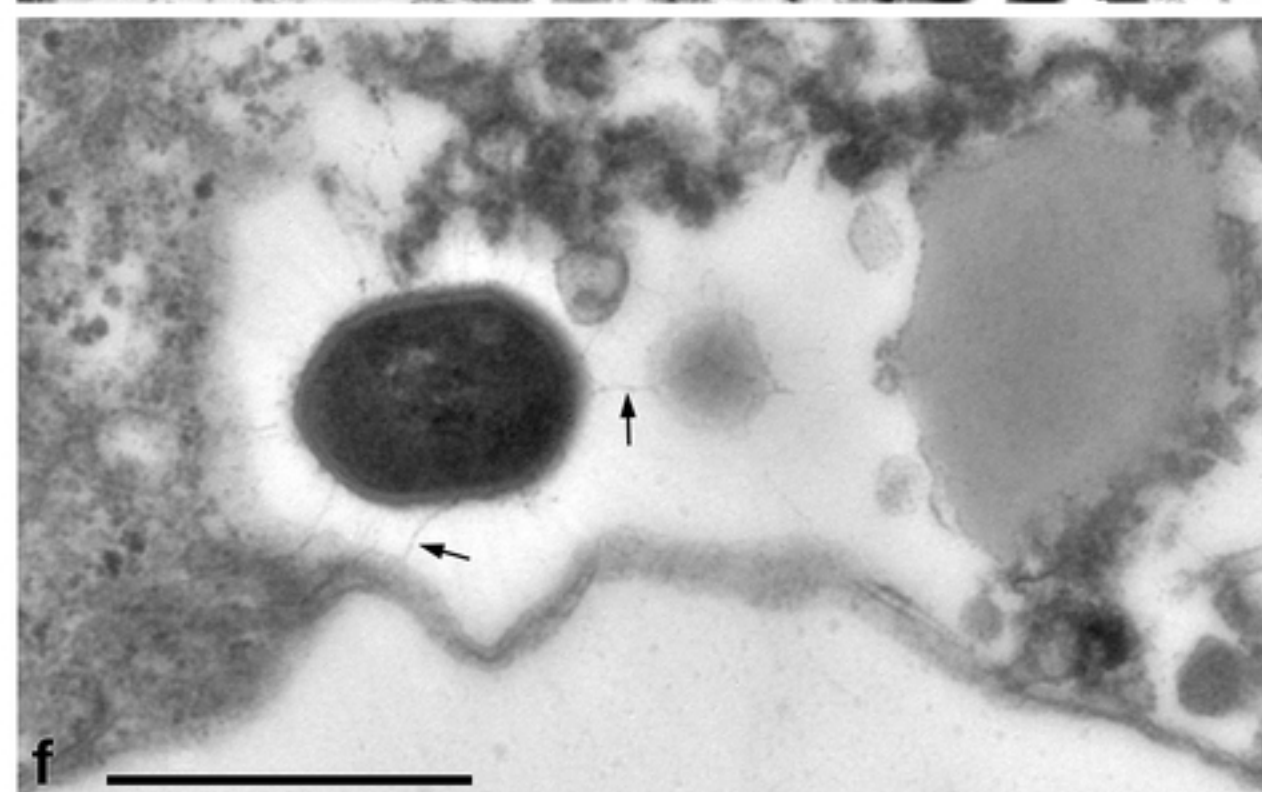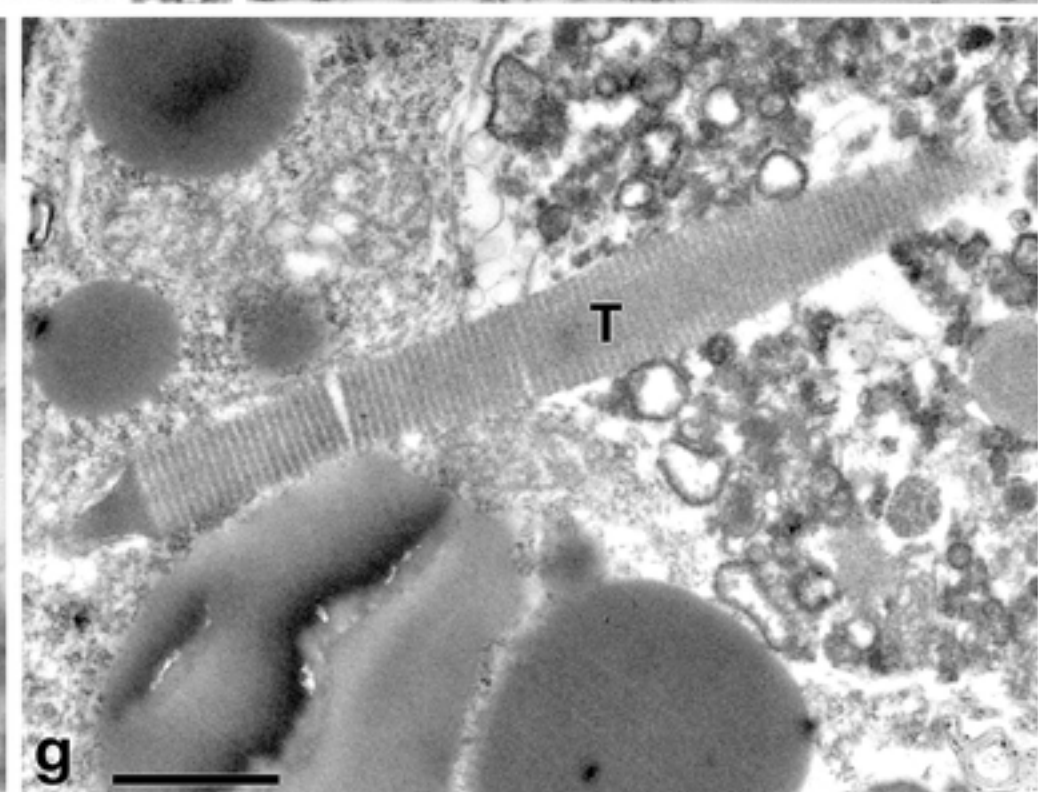

Figure 4

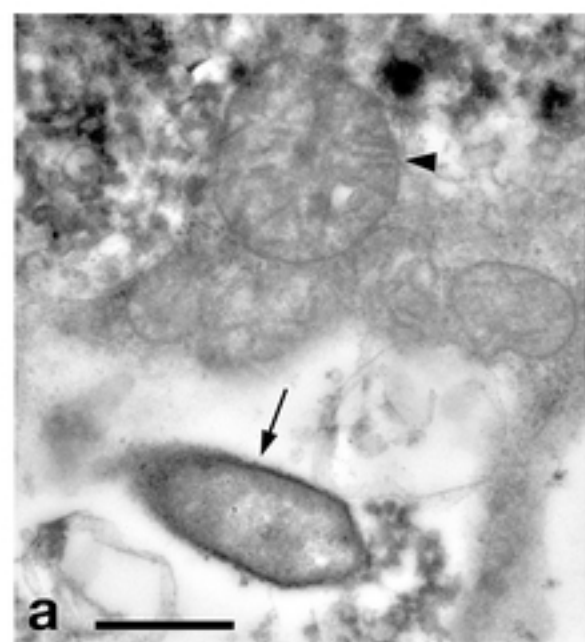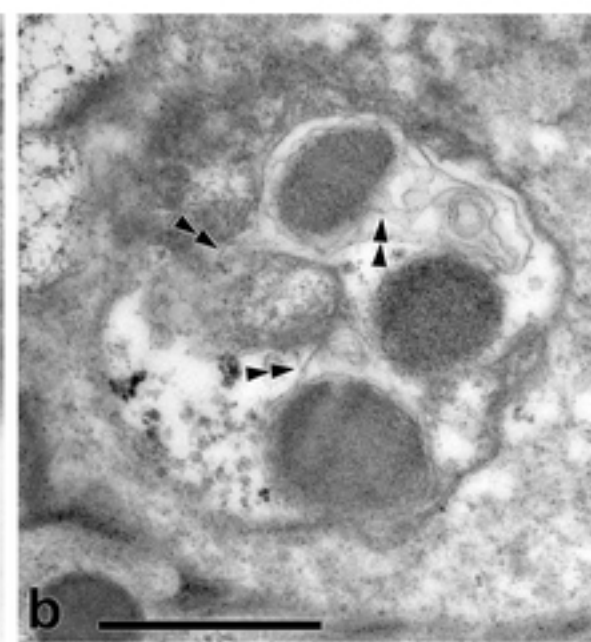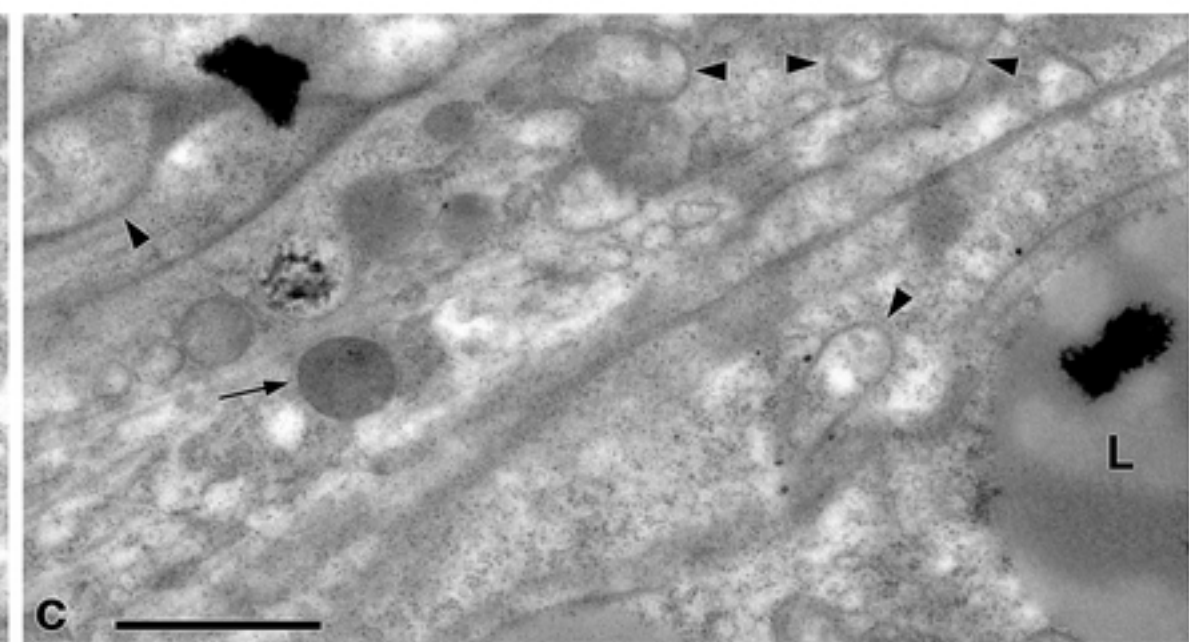

Figure 5
